1 **Increased ParB level affects expression of stress response, adaptation and virulence**  
2 **operons and potentiates repression of promoters adjacent to the high affinity binding**  
3 **sites *parS3* and *parS4* in *Pseudomonas aeruginosa***

4

5 Adam Kawalek<sup>1</sup>, Krzysztof Głabski<sup>1</sup>, Aneta Agnieszka Bartosik<sup>1</sup>, Anna Fogtman<sup>2</sup> and  
6 Grażyna Jagura-Burdzy<sup>1\*</sup>

7

8 <sup>1</sup> Institute of Biochemistry and Biophysics, Polish Academy of Sciences, Department of  
9 Microbial Biochemistry, Warsaw, Poland

10 <sup>2</sup> Institute of Biochemistry and Biophysics, Polish Academy of Sciences, Laboratory of  
11 Microarray Analysis, Warsaw, Poland

12

13 **Abstract**

14           Similarly to its homologs in other bacteria, *Pseudomonas aeruginosa* partitioning  
15 protein ParB facilitates segregation of newly replicated chromosomes. Lack of ParB is not  
16 lethal but results in increased frequency of anucleate cells production, longer division time,  
17 cell elongation, altered colony morphology and defective swarming and swimming motility.  
18 Unlike in other bacteria, inactivation of *parB* leads to major changes of the transcriptome,  
19 suggesting that, directly or indirectly, ParB plays a role in regulation of gene expression in  
20 this organism.

21           ParB overproduction affects growth rate, cell division and motility in a similar way as  
22 ParB deficiency. To identify primary ParB targets, here we analysed the impact of a slight  
23 increase in ParB level on *P. aeruginosa* transcriptome. ParB excess, which does not cause  
24 changes in growth rate and chromosome segregation, significantly alters the expression of 176  
25 loci. Most notably, the mRNA level of genes adjacent to high affinity ParB binding sites  
26 *parS1-4* close to *oriC* is reduced. Conversely, in cells lacking either *parB* or functional *parS*  
27 sequences the orfs adjacent to *parS3* and *parS4* are upregulated, indicating that direct ParB-  
28 *parS3/parS4* interactions repress the transcription in this region. In addition, increased ParB  
29 level brings about repression or activation of numerous genes including several transcriptional  
30 regulators involved in SOS response, virulence and adaptation. Overall, our data support the  
31 role of partitioning protein ParB as a transcriptional regulator in *Pseudomonas aeruginosa*.

32

### 33 **Introduction**

34           Accurate copying and segregation of genetic material to progeny cells is crucial for  
35 survival and maintenance of species identity. The process of bacterial DNA segregation was  
36 first deciphered for low-copy-number plasmids [1–4]. Active partitioning of such plasmids  
37 during cell division requires three specific plasmid-encoded factors: an NTPase (A-  
38 component), a DNA-binding protein (DBP, B-component) and a special site in DNA,  
39 designated centromere-like sequence (*parS/parC*). Interactions of DBP with *parS* sequence(s)  
40 lead to formation of segrosomes which are then separated by a dynamic NTPase machinery to  
41 polar positions assuring their proper segregation during the subsequent cell division [2,3].  
42 Plasmidic active partition systems have been classified into three groups based on the type of  
43 NTPase and structure of DBP [2,4]. Homologs of plasmidic Type IA partition proteins,  
44 Walker-type ATPases (ParAs) and large DBPs with helix-turn-helix motifs (ParBs), which  
45 after binding to *parS* spread on DNA and form large nucleoprotein complexes [5], are also  
46 encoded on the majority of bacterial chromosomes [3,4,6]. Multiple copies of highly  
47 conserved *parS* sequences are mainly clustered in the so-called *ori* domain comprising ca.  
48 20% of the chromosome [7].

49           The role of the ParABS systems in accurate bacterial chromosome segregation is  
50 widely acknowledged but varies from essential, as exemplified by *Caulobacter crescentus* [8]  
51 or *Myxococcus xanthus* [9], to accessory, as in *Bacillus subtilis* [10–13], *Streptomyces*  
52 *coelicolor* [14], *Vibrio cholerae* [15,16] or *Pseudomonas aeruginosa* [17–19]. Apart from  
53 their well-established role in the segregation of newly replicated *ori* domains through DNA  
54 compaction [20–22], proper positioning of *ori* domains in the cell [19,23], Par proteins have  
55 also been shown to play a role in the control of DnaA activity and replication initiation  
56 [24,25] as well as in coordination of cell cycle and differentiation [26–28]. Chromosomal  
57 ParB homologs bind to *parS in vitro*, polymerize on DNA and bridge distant sequences

58 [13,29–32]. Whole-genome analyses using chromatin immunoprecipitation (ChIP) have  
59 demonstrated spreading of ParB homologs around *parS* sites for up to 20 kb [5,26–29].  
60 Despite the ParB spreading, a transcriptomic analysis in *B. subtilis* did not identify any  
61 significant changes in gene expression in a *spo0J* null mutant (Spo0J is a ParB homolog)  
62 relative to a WT strain [35]. Limited ParB-dependent transcriptional silencing in the  
63 proximity of *parS* sequences has been observed only for several genes in *V. cholerae* [34] and  
64 *S. pneumoniae* [36].

65 In *P. aeruginosa* a lack of ParA and/or ParB is not lethal but results in up to 1000-fold  
66 increased frequency of production of anucleate cells even during growth in optimal conditions  
67 [17,18,37]. Various *par* mutants exhibit longer division time, increase in cell size, altered  
68 colony morphology and are impaired in swarming and swimming motility [17,18]. Ten *parS*  
69 sites scattered in the chromosome of *P. aeruginosa* have been identified, but only four of  
70 them closest to *oriC* seem to be involved in chromosome segregation [33,38]. A  
71 transcriptomic analysis of *P. aeruginosa parA* and *parB* mutants has demonstrated changes in  
72 expression of hundreds of loci [39], including genes related to stress response but also many  
73 known and putative transcriptional regulators, suggesting a direct and/or indirect role of Par  
74 proteins in the regulation of gene expression. In test plasmids, ParB of *P. aeruginosa* was  
75 found to spread around *parS* and silence nearby promoters [37], but a comparison of the *parB*  
76 mutant and WT transcriptomes did not reveal any obvious changes in the expression of genes  
77 adjacent to chromosomal *parS* sequences [39]. However, a recent ChIP-seq analysis of ParB  
78 distribution on the *P. aeruginosa* chromosome has revealed, in addition to the region around  
79 the high affinity *parS1-4* sequences, also secondary ParB binding sites, apparently not related  
80 to known *parS* sites [33].

81 Similarly to the lack of ParB, also its excess in *P. aeruginosa* affects the cell cycle, as  
82 highlighted by slower growth rate, and causes cell elongation and defects in swarming and

83 swimming. ParB excess manifests in nucleoid condensation and increased frequency of  
84 anucleate cells formation [17,37,40,41]. The toxicity of ParB overproduction is significantly  
85 diminished when ParB is impaired in its polymerization domain [40] whereas ParB variants  
86 defective in interactions with DNA, either due to the inability to form dimers or mutations in  
87 the DNA binding domain, demonstrate no toxicity [40,41]. This suggests that DNA binding  
88 and spreading of ParB protein is crucial for its biological function.

89 In this project we analysed changes in the transcriptome of *P. aeruginosa* cells with a  
90 slightly increased ParB level, not affecting growth rate and chromosome segregation, to  
91 define the primary targets of ParB.

## 92 **Materials and methods**

### 93 **Bacterial strains and growth conditions**

94 Bacterial strains used in this study are listed in Table 1. Cultures were grown in L  
95 broth [42] or on L agar (L broth solidified with 1.5% agar) at 37°C. For selection of plasmids  
96 *Escherichia coli* media were supplemented with 150 µg ml<sup>-1</sup> (liquid cultures) or 300 µg ml<sup>-1</sup>  
97 (solid media) penicillin (Pn), 10 µg ml<sup>-1</sup> chloramphenicol (Cm) or 50 µg ml<sup>-1</sup> kanamycin  
98 (Km). Chloramphenicol at concentration 75 µg ml<sup>-1</sup> (liquid cultures) and 150 µg ml<sup>-1</sup> (solid  
99 media) was used to maintain plasmids in *P. aeruginosa*. 300 µg ml<sup>-1</sup> carbenicillin (Cb) and  
100 300 µg ml<sup>-1</sup> rifampicin (Rif) was added to the solid medium for the selection of *P. aeruginosa*  
101 transconjugants in allele exchange procedure. To induce the expression from the *araBAD*  
102 promoter arabinose (Ara) was added to 0.02% to cultures of PAO1161 with pKGB8  
103 (*araBADp*) or pKGB9 (*araBADp-parB*) and to 0.1% in PAO1161::*araBADp* or  
104 PAO1161::*araBADp-flag-parB* cultures. For MIC analysis of PAO1161 (pKGB8) and  
105 PAO1161 (pKGB9) and PAO1161 as a control, strains were grown in Mueller Hinton cation

106 adjusted medium in the range of Ara concentrations (0, 0.02 and 0.2%) and in the presence of  
 107 a gradient of piperacillin, ticarcillin, ciprofloxacin, gentamicin, tobramycin or imipenem.

108 **Table 1 Bacterial strains used in this study.**

| Strain                              | Description                                                                                                                                                                                       | Reference  |
|-------------------------------------|---------------------------------------------------------------------------------------------------------------------------------------------------------------------------------------------------|------------|
| <i>Escherichia coli</i>             |                                                                                                                                                                                                   |            |
| DH5 $\alpha$                        | F <sup>-</sup> $\Phi$ 80lacZ $\Delta$ M15 $\Delta$ (lacZYA-argF) U169 recA1 endA1<br>hsdR17 (r <sub>K</sub> <sup>-</sup> , m <sub>K</sub> <sup>+</sup> ) phoA supE44 $\lambda$ thi-1 gyrA96 relA1 | [43]       |
| S17-1                               | pro $\Delta$ hsdR hsdM <sup>+</sup> recA T <sub>p</sub> <sup>R</sup> Sm <sup>R</sup> $\Omega$ RP4-Tc::Mu Kn::Tn7                                                                                  | [44]       |
| <i>Pseudomonas aeruginosa</i>       |                                                                                                                                                                                                   |            |
| PAO1161                             | PAO1161 Rif <sup>R</sup> leu                                                                                                                                                                      | [17]       |
| PAO1161 <i>parB</i> <sub>null</sub> | PAO1161 Rif <sup>R</sup> leu <i>parB</i> 1-18::tetM, Tc <sup>R</sup>                                                                                                                              | [17]       |
| PAO1161 <i>parS</i> <sub>null</sub> | PAO1161 Rif <sup>R</sup> with ten <i>parS</i> sequences mutated or deleted to impair ParB binding to these sequences                                                                              | [38]       |
| PAO1161:: <i>araBADp</i>            | PAO1161 Rif <sup>R</sup> with <i>araC araBADp</i> T <sub>rrnB</sub> <sup>1</sup> cassette integrated in intergenic region between PA5412 and PA5413 (at position 6091513 nt)                      | this study |
| PAO1161:: <i>araBADp-flag-parB</i>  | PAO1161 Rif <sup>R</sup> with <i>araC araBADp-flag-parB</i> T <sub>rrnB</sub> cassette integrated in intergenic region between PA5412 and PA5413 (at position 6091513 nt)                         | this study |
| PAO1161:: <i>bexRp-lacZ</i>         | PAO1161 Rif <sup>R</sup> Cb <sup>R</sup> with <i>bexRp-lacZ</i> cassette integrated in intergenic region between PA5412 and PA5413 (at position 6091513 nt)                                       | this study |

109 <sup>1</sup>T<sub>rrnB</sub> transcriptional terminator of *E. coli* *rrnB* gene

110 **Transformation and conjugation procedures**

111 Transformation of *E. coli* and *P. aeruginosa* was performed by standard procedures  
 112 [43,45]. Conjugation between transformants of *E. coli* S17-1 and *P. aeruginosa* PAO1161  
 113 Rif<sup>R</sup> was performed on solid media as described previously [37].

#### 114 Plasmids and DNA manipulations

115 Plasmids used in this study are listed in Table 2. Plasmid manipulations were carried  
 116 out by standard procedures [46]. Oligonucleotides used in this work are listed in Table S1. All  
 117 new plasmid constructs were verified by sequencing at the Laboratory of DNA Sequencing  
 118 and Oligonucleotide Synthesis, IBB PAS.

#### 119 Table 2 Plasmids used in this study.

| Plasmid  | Description                                                                                                                                                                                                                   | Reference     |
|----------|-------------------------------------------------------------------------------------------------------------------------------------------------------------------------------------------------------------------------------|---------------|
| pABB1.0  | pBBRMCS1 derivative, BHR <sup>1</sup> , <i>ori</i> <sub>IncA/C</sub> , Cm <sup>R</sup>                                                                                                                                        | [47]          |
| pABB28.2 | pET28a with <i>his</i> -tag replaced by <i>flag</i> -tag, Km <sup>R</sup>                                                                                                                                                     | this study    |
| pAKE600  | suicide vector, <i>ori</i> V <sub>MB1</sub> , <i>sacB</i> gene, Pn <sup>R</sup>                                                                                                                                               | [48]          |
| pBAD24   | expression vector, <i>ori</i> V <sub>MB1</sub> , <i>araC</i> <i>araBAD</i> p T <sub>rmB</sub> cassette, Pn <sup>R</sup>                                                                                                       | [49]          |
| pCM132   | BHR <sup>1</sup> , dual replicon promoter-probe vector <i>ori</i> V <sub>ColE1</sub> , <i>ori</i> V <sub>RK2</sub> ,<br><i>trfA</i> <sub>RK2</sub> , <i>oriT</i> <sub>RK2</sub> , promoter-less <i>lacZ</i> , Km <sup>R</sup> | [50]          |
| pET28a   | expression vector, <i>ori</i> V <sub>MB1</sub> , T7p, 6xHis-tag, Km <sup>R</sup>                                                                                                                                              | Novagen, Inc. |
| pKAB132  | pPJB132 with deletion of EcoRI-BglII fragment, control vector,<br>Cm <sup>R</sup> , Km <sup>R</sup>                                                                                                                           | this study    |
| pKAB133  | pPJB132 with PA0011p- <i>lacZ</i>                                                                                                                                                                                             | this study    |
| pKAB134  | pPJB132 with PA0011p <sub>parS3mut</sub> - <i>lacZ</i>                                                                                                                                                                        | this study    |
| pKAB135  | pPJB132 with PA0013p- <i>lacZ</i>                                                                                                                                                                                             | this study    |
| pKAB136  | pPJB132 with PA0013p <sub>parS4mut</sub> - <i>lacZ</i>                                                                                                                                                                        | this study    |
| pKAB240  | pBAD24 with NsiI restriction site between T <sub>rmB</sub> and <i>blap</i>                                                                                                                                                    | this study    |
| pKAB241  | pKAB240 with <i>flag</i> tagged <i>P. aeruginosa</i> <i>parB</i> ( <i>araBAD</i> p- <i>flag</i> -<br><i>parB</i> )                                                                                                            | this study    |
| pKAB242  | pKAB240 with T <sub>rmB</sub> - <i>mcs</i> - <i>lacZ</i> (partial)-T <sub>T7</sub> <sup>2</sup> cassette inserted as                                                                                                          | this study    |

|         |                                                                                                                                                      |            |
|---------|------------------------------------------------------------------------------------------------------------------------------------------------------|------------|
|         | NsiI fragment                                                                                                                                        |            |
| pKAB243 | pKAB242 with insertion of full-length <i>lacZ</i> and <i>mcs</i> , contains complete $T_{rmB}$ - <i>mcs-lacZ</i> - $T_{T7}$ cassette (NsiI fragment) | this study |
| pKAB600 | pAKE600 with <i>P. aeruginosa</i> genomic fragment (coordinates 6090756 - 6092192) with PstI at position 6091513 nt                                  | this study |
| pKAB601 | pKAB600 with <i>araC araBADp T<sub>rmB</sub></i> cassette                                                                                            | this study |
| pKAB602 | pKAB600 with <i>araC araBADp-flag-parB T<sub>rmB</sub></i> cassette                                                                                  | this study |
| pKAB603 | pKAB600 with deletion of EcoRI restriction site                                                                                                      | this study |
| pKAB604 | pKAB603 with $T_{rmB}$ - <i>mcs-lacZ</i> - $T_{T7}$ cassette                                                                                         | this study |
| pKAB605 | pKAB604 with <i>BexRp</i> cloned in the <i>mcs</i> , $T_{rmB}$ - <i>BexRp-lacZ</i> - $T_{T7}$ cassette                                               | this study |
| pKGB8   | pABB1.0 with <i>araC araBADp</i> , expression vector                                                                                                 | this study |
| pKGB9   | pKGB8 with <i>araBADp-parB<sub>P.a.</sub></i>                                                                                                        | this study |
| pKRP10  | <i>ori<sub>MB1</sub></i> , contains Cm <sup>R</sup> cassette, Pn <sup>R</sup>                                                                        | [51]       |
| pMKB5.2 | <i>ori<sub>MB1</sub></i> , <i>cyaAT18-parB<sub>P.a.</sub></i> translational fusion, Pn <sup>R</sup>                                                  | [48]       |
| pPJB132 | pCM132 with Cm <sup>R</sup> cassette, Cm <sup>R</sup> , Km <sup>R</sup>                                                                              | this study |

120 <sup>1</sup> BHR, broad-host-range plasmid

121 <sup>2</sup>  $T_{T7}$ , T7 phage transcriptional terminator

122

123 Plasmid pKGB8 was constructed by ligation of Eco47III-PstI fragment from pBAD24  
 124 containing *araC araBADp* with HincII and PstI digested pABB1.0. Subsequently, EcoRI-SacI  
 125 fragment from pMKB5.2 containing *parB* ORF was cloned into pKGB8 to yield plasmid  
 126 pKGB9.

127 pET28a (Novagen, Inc.) was modified to add *flag*-tag instead of *his*-tag to the coding  
 128 sequences. Oligonucleotides #1 and #2 were combined, heated to 100°C for 5 minutes and left  
 129 for annealing at room temperature. pET28a vector was digested using NcoI and NdeI and  
 130 ligated with obtained synthetic DNA fragment to yield pABB28.2.

131 To facilitate transfer of the *araC-araBADp-T<sub>rmB</sub>* cassette, an additional NsiI restriction  
 132 site was introduced into pBAD24 downstream of  $T_{rmB}$ . Two fragments amplified by PCR



133 using pBAD24 as a template and primer pairs #3/#4 and #5/#6, respectively, were used as a  
134 template in the second round of PCR with primers #3 and #6 to obtain a 1160 bp product that  
135 replaced the HindIII-ScaI fragment in pBAD24 to yield pKAB240.

136 The *flag-parB* fusion was constructed using similar strategy. The *flag* sequence  
137 amplified from pABB28.2 using primers #7/#8 and *P. aeruginosa parB* gene amplified from  
138 PAO1161 genomic DNA using primers #9/#10 were combined and used as a template in  
139 overlap PCR with primers #7/#10. The obtained PCR fragment with *flag-parB* fusion was  
140 digested with EcoRI and Sall and ligated into pKAB240 to yield pKAB241.

141 To construct PAO1161::*araBADp* and PAO1161::*araBADp-flag-parB* strains, the  
142 suicide plasmids pKAB601 and pKAB602 were constructed. First, the intergenic region  
143 between *PA5412* and *PA5413* from PAO1161 chromosome was amplified in two parts with  
144 pairs of primers #11/#12 and #13/#14. Primers #12 and #13 introduced a PstI site. The  
145 obtained PCR fragments were digested either with MfeI and PstI or PstI and BamHI,  
146 respectively, and the mixture was ligated with EcoRI and BamHI digested pAKE600 [48] to  
147 yield pKAB600. The *araC-araBADp-T<sub>rrmB</sub>* cassette from pKAB240 and *araC-araBADp-flag-*  
148 *parB-T<sub>rrmB</sub>* cassette from pKAB241 were excised as NsiI fragments and ligated into PstI site  
149 of pKAB600 to yield pKAB601 and pKAB602, respectively. *E. coli* S17-1 strain was  
150 transformed with pKAB601 or pKAB602 and the transformants were used as donor strains in  
151 conjugation with PAO1161 Rif<sup>R</sup> [18]. The cassettes were integrated in the defined region of  
152 PAO1161 using the allele exchange procedure [18] to obtain PAO1161::*araBADp* and  
153 PAO1161::*araBADp-flag-parB*.

154 pCM132 was modified by insertion of Cm<sup>R</sup> cassette (SphI fragment from pKRP10  
155 [51]) into SphI site, downstream of *lacZ*, to yield pPJB132. Putative promoter sequences  
156 preceding *PA0011* and *PA0013* were amplified on PAO1161 genomic DNA using primer  
157 pairs #15/#16 and #17/#18, respectively. The *PA0011p<sub>parS3mut</sub>* and *PA0013p<sub>parS4mut</sub>* fragments

158 were amplified on PAO1161 *parS*<sub>null</sub> genomic DNA [38] as a template using the same primer  
159 pairs. PCR products were digested with EcoRI and BamHI and ligated between EcoRI and  
160 BglIII sites into pPJB132 to yield plasmids pKAB133 (*PA0011p-lacZ*), pKAB134  
161 (*PA0011p<sub>parS3mut</sub>-lacZ*), pKAB135 (*PA0013p-lacZ*) and pKAB136 (*PA0013p<sub>parS4mut</sub>-lacZ*).  
162 The empty control vector for  $\beta$ -galactosidase measurements (pKAB132) was obtained by  
163 digestion of pPJB132 with EcoRI and BglIII, blunting by fill-in with Klenow fragment of  
164 DNA PolI and self-ligation.

165 To construct PAO1161 Rif<sup>R</sup> strain with *bexRp-lacZ* cassette integrated in intergenic  
166 region between *PA5412* and *PA5413*, the suicide plasmid pKAB605 was constructed. First,  
167 the *T<sub>rrmB</sub>* with *mcs*, part of the *lacZ* gene and *T<sub>T7</sub>* was amplified using overlap PCR strategy.  
168 To this end, 2 fragments were amplified on pCM132 plasmid as a template using primer pairs  
169 #19/#20 and #21/#22, respectively, and the 3rd fragment was amplified on pET28a using  
170 primer pair #23/#24. The three fragments were mixed and used as a template in an overlap  
171 PCR with primers #19/#24. The obtained 787 bp product digested with NsiI replaced the  
172 *araC-araBADp-T<sub>rrmB</sub>* in pKAB240 yielding plasmid pKAB242. *mcs-lacZ* was subsequently  
173 excised from pCM132 as EcoRI and BlnI fragment and ligated with EcoRI-BlnI digested  
174 pKAB242 to yield pKAB243, containing complete *T<sub>rrmB</sub>-mcs-lacZ-T<sub>T7</sub>* cassette.

175 The single EcoRI restriction site in pKAB600 plasmid was removed by EcoRI  
176 digestion, filling in by Klenow fragment of DNA PolI and plasmid self-ligation to yield  
177 pKAB603. The *T<sub>rrmB</sub>-mcs-lacZ-T<sub>T7</sub>* cassette excised from pKAB243 by NsiI digestion was  
178 ligated into PstI site of pKAB603 to yield pKAB604. The region preceding *bexR* (*PA2432*)  
179 gene was amplified on PAO1161 genomic DNA using primers #25/#26, digested with EcoRI  
180 and BamHI and ligated with EcoRI and BglIII digested pKAB604 to yield plasmid pKAB605  
181 carrying *T<sub>rrmB</sub>-bexRp-lacZ-T<sub>T7</sub>* cassette flanked by sequences allowing integration in the  
182 intergenic region between *PA5412* and *PA5413*. *E. coli* S17-1 strain transformed with

183 pKAB605 was used as donor in conjugation with PAO1161 Rif<sup>R</sup> [18]. The suicide vector was  
184 integrated in the defined region of PAO1161 (at position 6091513 nt) using homology  
185 recombination [18] and the carbenicillin-resistant integrant (PAO1161::*bexRp-lacZ*) was used  
186 as a recipient in a subsequent conjugation with S17-1 cells carrying pKGB8 or pKGB9  
187 plasmids. Transconjugants were selected on L agar plates with carbenicillin, chloramphenicol  
188 and 40 µg ml<sup>-1</sup> X-gal to allow visualization of *bexRp-lacZ* induction immediately after the  
189 introduction of plasmids.

## 190 **RNA isolation**

191 *P. aeruginosa* strains taken from -80°C stocks were grown on L agar plates at 37°C  
192 and single colonies were used to inoculate three independent cultures (biological replicates).  
193 After overnight growth, the cultures were diluted 1:100 into fresh L broth and grown to the  
194 optical density 0.4- 0.6 at 600 nm (OD<sub>600</sub>). RNA was isolated with RNeasy mini kit (Qiagen)  
195 according to the manufacturer's protocol for bacterial cells from 2 ml of cultures mixed with 4  
196 ml of RNAProtect Bacteria Reagent (Qiagen). Total RNA was digested with DNase (TURBO  
197 DNA-free Kit, Ambion) to remove genomic DNA.

## 198 **Microarray analysis**

199 Microarray analysis was performed essentially as described before [39]. The raw  
200 microarray data have been deposited at the NCBI Gene Expression Omnibus database at  
201 accession number GSE95647 (release after publication acceptance). Gene expression data  
202 were analysed using Partek Genomic Suite v6.6 (Partek Inc., St. Louis, MO). Raw data were  
203 processed using GeneChip Robust Multiarray Averaging (GC RMA): background correction,  
204 quantile normalization, log<sub>2</sub> transformation and median polish summarization. Analysis of  
205 variance (ANOVA) using REML (restricted maximum likelihood) was performed to identify  
206 differentially expressed genes. Gene lists were created using a cut-off of  $p\text{-value} \leq 0.05$ , with a

207 fold change (FC) higher than 2 or lower than -2. Clustering of the genes according to  
208 expression pattern changes was performed by K-means clustering [52] using MultiExperiment  
209 Viewer v4.9 [53]. The gene expression data for individual replicates were averaged,  
210 normalized to zero-mean and unit variance, and subjected to clustering into six clusters, using  
211 Pearson correlation as the distance metric and 500 as the maximum number of iterations.

## 212 **RT-qPCR analysis**

213 cDNA was synthesized with the TranScriba cDNA synthesis kit (A&A Biotechnology,  
214 Poland) using 1.5 µg of total RNA per reaction and random hexamer primers. RT-qPCR  
215 reactions were performed in a Roche LightCycler 480 using Hot FIREPol EvaGreen qPCR  
216 Mix Plus (Solis Biodyne). The reactions were performed with 0.15- 0.3 µl of cDNA in a total  
217 volume of 20 µl. Three technical replicates were used for each gene/primer combination. The  
218 primers used to amplify target and reference genes are listed in Table S1. Changes in the gene  
219 expression were calculated using the Pfaffl method [54] with normalization to the reference  
220 gene *nadB* (*PA0761*). RT-qPCR data represent mean for 3 biological replicates and 3  
221 technical replicates. All RT-qPCR experiments were repeated twice and representative  
222 experiments are shown.

## 223 **Western blotting**

224 Cultures were grown on L broth to OD<sub>600</sub> 0.4-0.6. Cells were harvested by  
225 centrifugation and stored at -20°C. For each sample a small aliquot was used to estimate the  
226 number of c.f.u. ml<sup>-1</sup> by plating appropriate dilution of the culture on L agar plates. Pellets  
227 were resuspended in 10 mM Tris-HCl (pH 8.0), 1 M NaCl, 0.1 mM EDTA, 5% glycerol. For  
228 each sample different volume of the buffer was used to compensate the initial differences in  
229 c.f.u. ml<sup>-1</sup>. Samples were sonicated and aliquots of cleared extracts corresponding to 10<sup>9</sup> cells  
230 were separated by SDS-PAGE on 12% polyacrylamide gels. Additionally, His<sub>6</sub>-ParB, purified

231 as described [37], was loaded on each gel. Separated proteins were transferred onto  
232 nitrocellulose membranes. The blots were subjected to a two-step immunoreaction including  
233 application of rabbit polyclonal anti-ParB antibodies followed by incubation with goat anti-  
234 rabbit antibodies conjugated with alkaline phosphatase and were developed by addition of  
235 NBT/ BCIP mixture. Band intensity was estimated using ImageJ for at least 3 biological  
236 replicates.

### 237 **Biofilm formation assay**

238 Biofilm formation in static cultures was assayed as described previously with minor  
239 modifications [55]. Overnight cultures of *P. aeruginosa* strains in three biological replicates  
240 were diluted 1:100 in L broth with or without 0.02% arabinose. 75  $\mu\text{g ml}^{-1}$  chloramphenicol  
241 was added to maintain the plasmids. 100  $\mu\text{l}$  aliquots of each diluted culture were transferred  
242 into 9 wells of a 96-well flat-bottom polystyrene microplate (Greiner Bio-One). Sterile L  
243 broth was used as a negative control. The plate was incubated without shaking at 37°C until  
244  $\text{OD}_{600}$  reached approximately 0.5. The optical density  $\text{OD}_{600}$  was measured using a plate  
245 reader (BioTek Synergy HT) and bacterial cells, which did not adhere to the surface, were  
246 gently removed by aspiration with a pipette. Wells were washed twice with 100  $\mu\text{l}$  of PBS (15  
247 mM KCl, 150 mM NaCl, 10 mM NaPi pH 7.4) and biofilm in each well was stained with 100  
248  $\mu\text{l}$  of 0.1% crystal violet solution. After 15 min incubation at room temperature, crystal violet  
249 solution was aspirated and wells were rinsed three times with distilled water and twice with  
250 100  $\mu\text{l}$  of PBS. Subsequently, 100  $\mu\text{l}$  of 96% ethanol was added to each well and left for 10  
251 min to dissolve the crystal violet. Well content was mixed by pipetting and  $\text{OD}_{590}$  was  
252 measured using a plate reader and 96% ethanol as a blank. Biofilm formation is presented as  
253 proportion  $\text{OD}_{590}/\text{OD}_{600}$ .

### 254 **$\beta$ -galactosidase activity assays**

255  $\beta$ -galactosidase activity was measured as described before [42]. Extracts were  
256 prepared from cells grown to OD<sub>600</sub> 0.4-0.6 in L broth with 75  $\mu\text{g ml}^{-1}$  chloramphenicol, with  
257 or without 0.1% arabinose.

## 258 **Results**

### 259 **Impact of *parB* overexpression on gene expression in *P. aeruginosa***

260 Our previous microarray analysis revealed altered expression of 1166 genes in ParB-  
261 deficient cells of *P. aeruginosa* relative to the wild type PAO1161 (WT) cells [39]. To  
262 complement this study, here we analysed the transcriptome of ParB -overproducing cells. To  
263 control the level of *parB* expression we constructed a pKGB8 expression vector based on the  
264 broad-host-range pBBR1MCS-1 [56], which contains the arabinose (Ara) inducible promoter  
265 *araBADp* [49]. Analysis of the growth of PAO1161 (pKGB9 *araBADp-parB*) and PAO1161  
266 (pKGB8) cells in the presence of different concentrations of Ara revealed that induction by  
267 Ara  $\leq 0.02\%$  did not affect the growth (Fig 1A). A slight increase in the ParB level ( $\leq 2$ -fold)  
268 was observed even in non-induced cells of PAO1161 (pKGB9) relative to the cells containing  
269 the empty vector according to Western blot analysis (Fig 1B). Addition of 0.02% Ara to the  
270 medium resulted in a 5-fold increase in the ParB amount per cell in mid-log phase cultures of  
271 PAO1161 (pKGB9) in comparison to PAO1161 (pKGB8) (Fig 1B). Such ParB excess did not  
272 affect the frequency of anucleate cells formation, cell size, colony morphology or swimming  
273 and swarming motility (data not shown) but led to altered biofilm formation under specific  
274 conditions (Fig 1C, discussed below).

### 275 **Fig 1. Effects of ParB excess in *P. aeruginosa*.**

276 (A) Growth of *P. aeruginosa* PAO1161 (pKGB8 *araBADp*) and PAO1161 (pKGB9  
277 *araBADp-parB*) strains in L broth with different arabinose concentrations. Data represent  
278 mean OD<sub>600</sub>. (B) Western blot analysis of ParB levels in the tested strains. Each lane contains

279 extract from  $10^9$  cells. Blots were subjected to immunodetection using primary anti-ParB  
280 antibodies. Representative blot is shown. Signals on the blots were quantified. Data represent  
281 mean ParB level  $\pm$ SD relatively to the control strain PAO1161 (pKGB8). Purified His<sub>6</sub>-ParB  
282 was used to generate standard curves. M – molecular weight marker. (C) Biofilm formation in  
283 the static cultures of PAO1161, PAO1161 (pKGB8) and PAO1161 (pKGB9). Strains were  
284 grown without or with 0.02% arabinose until OD<sub>600</sub> 0.5. Biofilm was stained with crystal  
285 violet and assessed by measurement of OD<sub>590</sub>. Data represent mean OD<sub>590</sub>/OD<sub>600</sub> ratio  $\pm$ SD  
286 from 3 biological replicates. \* - *p*-value < 0.05 in two-sided Student's *t*-test assuming equal  
287 variance.

288 To determine the impact of an increased ParB level on the transcriptome a microarray  
289 analysis was performed on RNA isolated from PAO1161 (pKGB9 *araBADp-parB*) cultures  
290 grown under selection in L broth with 0.02% Ara (higher ParB overproduction, hereafter  
291 referred to as ParB<sup>+++</sup>) or without Ara (mild ParB overproduction, hereafter called ParB<sup>+</sup>)  
292 as well as from PAO1161 (pKGB8) cells grown under selection in L broth with 0.02% Ara  
293 (empty vector control, hereafter EV) and PAO1161 cells grown in L broth without Ara (wild-  
294 type control, hereafter WT). A principal component analysis of the microarray data revealed  
295 that the biological replicates for WT and EV form 2 separate groups whereas the biological  
296 replicates of ParB<sup>+</sup> and ParB<sup>+++</sup> form together a separate group, distinct from WT and EV  
297 samples (data not shown).

298 Comparative transcriptome analysis of EV vs WT revealed 70 genes, four tRNA  
299 genes, and four intergenic regions with an altered expression in response to the presence of  
300 the vector [fold change (FC) <-2 or >2, *p*-value <0.05] (Fig 2A, Table S2). 175 genes and 1  
301 intergenic region displayed statistically significant difference in expression between  
302 ParB<sup>+++</sup> and EV cells using the same criteria. 155 out of 175 genes displayed an altered  
303 expression only in the response to the ParB abundance since they were not identified in the

304 EV *vs* WT analysis. The expression of the remaining 20 genes and one intergenic region was  
305 affected by the presence of vector as well as ParB overproduction in ParB+++ cells (Fig 2B,  
306 Table S2). The comparative analysis of ParB+ and EV transcriptomes revealed altered  
307 expression of 157 genes. There was a major overlap between the transcriptomic changes in  
308 ParB+ and ParB+++ cells as 122 genes showed similar responses in the ParB+ and ParB+++  
309 cells (Fig 2B, Table S2). This is not surprising as the transcription of *parB* (*PA5562*) itself  
310 was increased 4- and 12- fold in ParB+ and ParB+++ cells, respectively, in comparison to  
311 the EV cells.

312 **Fig. 2. Transcriptome changes in response to ParB overproduction.**

313 (A) Statistics of loci with significant expression change ( $FC < -2$  or  $> 2$ ,  $p$ -value  $< 0.05$ ). RNA  
314 was isolated from PAO1161 cultures grown in L broth without Ara (WT), PAO1161 (pKGB8  
315 *araBADp*) cultures grown under selection in L broth with 0.02% Ara (empty vector control,  
316 EV), PAO1161 (pKGB9 *araBADp-parB*) cultures grown under selection in L broth without  
317 Ara (mild ParB excess, ParB+) or with 0.02% Ara (higher ParB excess, ParB+++). (B) Venn  
318 diagram for sets of loci with significant expression change between EV *vs* WT, ParB+ *vs* EV  
319 and ParB+++ *vs* EV. (C) Classification of loci with altered expression according to  
320 PseudoCAP categories [57]. When a gene was assigned to multiple categories, one category  
321 was arbitrarily selected (Table S2). The PseudoCAP categories were grouped into six classes  
322 as marked. White and black bars correspond to the numbers of respectively, upregulated and  
323 downregulated genes in a particular category.

324 Interestingly, there was also a set of 35 genes with expression changed only in ParB+  
325 cells relative to EV cells but not in ParB+++ . Closer inspection of the expression changes of  
326 these genes revealed three subgroups (Fig S1A, Table S2): i/ 15 genes were also altered in  
327 ParB+++ transcriptome but with a slightly lower fold change ( $FC > 1.6$  or  $FC < -1.6$ ,  $p$ -value



328 <0.05) and were cut off from the common pool of ParB<sup>-</sup> affected genes using the criterion of  
329 FC, ii/ 6 genes despite their high FC were eliminated in ParB<sup>+++</sup> vs EV analysis because of  
330 slightly higher variation of their expression in biological replicates (0.05 < *p*-value < 0.1), iii/  
331 remaining 14 genes seemed to be not altered in ParB<sup>+++</sup> transcriptome. Whereas ParB<sup>+++</sup>  
332 and EV strains were grown under the same conditions (chloramphenicol and 0.02%  
333 arabinose), ParB<sup>+</sup> cells were not exposed to arabinose. To estimate the impact of inducer on  
334 gene expression PAO1161 (pKGB8) was grown in medium with or without 0.02% Ara and  
335 RT-qPCR analysis of eight loci from the group of 35 genes in question, representing all three  
336 subgroups, was performed. The expression of only one gene, *PA2113* (from the bi-cistronic  
337 operon *PA2113-2114*) was altered in response to Ara presence in the medium (Fig S1B).  
338 *PA2113-2114* belong to the third subgroup in the expression pattern analysis (see above) but  
339 also to a distinct set of 4 genes common for EV vs WT and ParB<sup>+</sup> vs EV lists (Fig 2B, Table  
340 S2), hence it is likely that these four genes appeared in our analysis due to the influence of  
341 Ara on their expression. Presence of Ara had no influence on the expression of 7 out of 8  
342 genes tested, which represent 14 genes due to the operon structures (Fig S1B), confirming that  
343 majority of genes with the expression altered in ParB<sup>+</sup> cells relative to EV cells was identified  
344 due to their response to ParB excess.

345 The genes with altered expression were assigned to PseudoCAP categories [57]  
346 divided arbitrarily into six classes as described previously [39]. The comparison of the EV  
347 and WT transcriptomes revealed that the majority of affected genes belong to three groups:  
348 Class II comprising genes encoding membrane proteins, proteins involved in transport of  
349 small molecules, and protein secretion systems (18 genes), Class V comprising genes  
350 involved in metabolic pathways (21 genes), and Class VI with 22 HUU genes (hypothetical,  
351 unclassified, unknown) (Fig. 2C, Table S2). Similarly, most of the genes with altered  
352 expression in ParB overproducing cells (ParB<sup>+++</sup> and ParB<sup>+</sup>) relative to EV cells were

353 assigned to the same three classes (II, V and VI). However, almost one third of the genes with  
354 expression altered in response to ParB overproduction fall into Class I, mainly to PseudoCAP  
355 categories RPTP (related to phage, transposon, plasmids) and SF (secreted factors: toxins,  
356 enzymes, alginate). These data suggest that an increased ParB level leads to the activation of  
357 stress response.

### 358 **Different expression patterns of genes affected by ParB excess**

359 To systematize the impact of the vector as well as the increased level of ParB on the  
360 PAO1161 transcriptome a K-means clustering analysis was performed [52]. The two lists of  
361 altered genes (ParB+ vs EV and ParB+++ vs EV) were combined yielding 211 unique loci  
362 (Table S2). Expression data for replicates for each of these loci in the four strains/ growth  
363 conditions (WT, EV, ParB+, ParB+++ ) were averaged, normalized to zero mean and unit  
364 variance and grouped into six clusters based on the similarity of their expression patterns (Fig  
365 3A and B).

### 366 **Fig 3. K-means clustering of microarray data.**

367 Expression data for replicates for each of 211 loci displaying altered expression in ParB  
368 overproducing cells were averaged, normalized to zero mean and unit variance and grouped  
369 into six clusters. **(A)** Expression profiles of individual genes grouped according to the results  
370 of K-means clustering. Each horizontal line represents one gene. Red and blue denote that the  
371 expression is respectively, above or below the mean expression of a gene across the data set.  
372 **(B)** Expression profiles for genes in each cluster. Y-axis represents the difference between  
373 expression of a particular gene in tested conditions and the mean expression of this gene in all  
374 4 conditions presented as the number of standard deviations that a particular data point differs  
375 from the mean. Thick black lines represent the cluster centres. The genes from each cluster  
376 and their expression levels in different cells are listed in Table S3.

377 Clusters 1 to 4 contain genes that are upregulated in ParB<sup>+</sup> and/or ParB<sup>+++</sup> cells  
 378 relative to EV cells and clusters 5 and 6 the downregulated ones. A detailed description of the  
 379 genes in each cluster as well as their mean expression levels in the four conditions are given  
 380 in Table S3.

381 To validate the expression patterns obtained from the microarray analysis the  
 382 transcript level for selected genes from each cluster in various samples was analysed using  
 383 RT-qPCR. Importantly, for all tested 12 genes their relative levels of expression detected by  
 384 RT-qPCR correlated nearly perfectly with the microarray data (Table 3).

385 **Table 3 Validation of the microarray data by RT-qPCR.**

| Cluster | Gene ID       | WT   |             | EV       | ParB <sup>+</sup> |             | ParB <sup>+++</sup> |             |
|---------|---------------|------|-------------|----------|-------------------|-------------|---------------------|-------------|
|         |               | MA   | qPCR        | qPCR     | MA                | qPCR        | MA                  | qPCR        |
| 1       | <i>PA0612</i> | 0.66 | 0.76 ± 0.22 | 1 ± 0.06 | 6.54              | 5.62 ± 0.97 | 10.57               | 9.69 ± 3.3  |
| 1       | <i>PA0985</i> | 0.83 | 0.87 ± 0.16 | 1 ± 0.32 | 3.57              | 5.7 ± 1.67  | 5.02                | 7.1 ± 2.14  |
| 1       | <i>PA4635</i> | 0.60 | 0.48 ± 0.08 | 1 ± 0.12 | 2.95              | 1.42 ± 0.47 | 4.63                | 2.39 ± 1.12 |
| 1       | <i>PA5562</i> | 0.93 | 0.94 ± 0.21 | 1 ± 0.08 | 4.31              | 2.49 ± 0.43 | 12.06               | 17.3 ± 3.21 |
| 2       | <i>PA2432</i> | 0.62 | 0.57 ± 0.18 | 1 ± 0.29 | 8.36              | 5.13 ± 1.13 | 7.90                | 6.74 ± 0.1  |
| 2       | <i>PA3661</i> | 1.16 | 1.15 ± 0.45 | 1 ± 0.18 | 17.50             | 5.78 ± 2.23 | 23.34               | 8.39 ± 4.41 |
| 2       | <i>PA5471</i> | 0.24 | 0.28 ± 0.08 | 1 ± 0.25 | 2.24              | 2.01 ± 0.66 | 2.50                | 2.34 ± 0.34 |
| 3       | <i>PA2008</i> | 2.44 | 3.03 ± 1.06 | 1 ± 0.27 | 6.26              | 7.91 ± 1.36 | 3.81                | 3.91 ± 0.09 |
| 4       | <i>PA4659</i> | 1.73 | 0.97 ± 0.13 | 1 ± 0.13 | 1.83              | 2.23 ± 0.22 | 2.13                | 2.06 ± 0.1  |
| 5       | <i>PA0996</i> | 0.75 | 0.57 ± 0.01 | 1 ± 0.15 | 0.58              | 0.63 ± 0.22 | 0.31                | 0.33 ± 0.04 |
| 5       | <i>PA1003</i> | 0.87 | 0.73 ± 0.13 | 1 ± 0.24 | 0.72              | 0.58 ± 0.05 | 0.45                | 0.44 ± 0.04 |
| 6       | <i>PA0011</i> | 0.96 | 1.01 ± 0.2  | 1 ± 0.24 | 0.37              | 0.41 ± 0.03 | 0.20                | 0.24 ± 0.00 |

386 Relative transcript level of selected genes in replicates of *P. aeruginosa* cultures assessed by microarrays and  
 387 RT-qPCR. WT - PAO1161 grown in L broth, EV - PAO1161 (pKGB8) grown in L broth with 0.02% Ara,

388 ParB+ - PAO1161 (pKGB9) grown in L broth and ParB+++ - PAO1161 (pKGB9) grown in L broth with 0.02%  
389 Ara. Microarray (MA) data represent mean expression and RT-qPCR (qPCR) data represent mean  $\pm$ SD from  
390 three biological replicates.

### 391 **Genes upregulated in response to *parB* overexpression**

392 Clusters 1 (64 genes and one intergenic region), 2 (48 genes), 3 (21 genes) and 4 (12  
393 genes) contain loci upregulated in response to ParB overproduction. For eight of these loci an  
394 increased transcript level is also observed in EV cells relative to WT cells (Table S3, Table 4).  
395 Among these loci are *PA5471* gene encoding ArmZ, an inhibitor of MexZ which negatively  
396 regulates the *mexXY* operon encoding the multidrug efflux pump MexXY [58,59] and *pyeR*  
397 (*PA4354*) encoding a transcriptional regulator of biofilm formation [60]. Additionally, Cluster  
398 1 contains the *arr* (*PA2818*) gene predicted to encode a phosphodiesterase whose substrate is  
399 cyclic di-guanosine monophosphate (c-di-GMP), a bacterial secondary messenger that  
400 regulates cell surface adhesiveness, virulence and biofilm formation [61].

401 The biofilm formation was checked in the cultures of PAO1161 (pKGB9 *araBADp-*  
402 *parB*) in comparison to PAO1161 (pKGB8) during growth under static conditions. No  
403 difference was observed between the strains in the overnight cultures (data not shown).  
404 Notably, a significant increase in biofilm formation was observed in dividing cultures of  
405 PAO1161 (pKGB9 *araBADp-parB*) relative to PAO1161 (pKGB8), which correlates with the  
406 altered expression of genes involved in regulation of biofilm formation and identified in our  
407 study. No effect of arabinose presence on biofilm formation was detected (Fig 1C).  
408 Transcriptomic analysis also implicated that ParB excess could alter the response to antibiotic  
409 presence. The MICs for six antibiotics from  $\beta$ -lactam, aminoglycoside and fluoroquinolone  
410 groups (piperacillin, ticarcillin, imipenem, gentamicin, tobramycin and ciprofloxacin) were  
411 tested but no significant differences between PAO1161 (pKGB9) and control  
412 PAO1161(pKGB8) strains grown with and without arabinose were detected (data not shown).

**Table 4 Selected genes whose expression was identified as ParB regulated.**

| ID                                                                    | Gene          | Fold change |             |               | Cluster | Description                                                 |
|-----------------------------------------------------------------------|---------------|-------------|-------------|---------------|---------|-------------------------------------------------------------|
|                                                                       |               | EV vs WT    | ParB+ vs EV | ParB+++ vs EV |         |                                                             |
| <b>Genes induced by the presence of vector as well as ParB excess</b> |               |             |             |               |         |                                                             |
| PA0805                                                                |               | 3,3         |             | 2,2           | 1       | hypothetical protein                                        |
| PA1394                                                                |               | 2,1         | 2,0         | 2,7           | 1       | hypothetical protein                                        |
| PA2288                                                                |               | 2,2         | 2,3         | 4,2           | 1       | hypothetical protein                                        |
| PA4354                                                                | <i>pyeR</i>   | 3,2         |             | 2,3           | 1       | ArsR-family transcriptional repressor                       |
| PA4826                                                                |               | 2,6         |             | 2,5           | 1       | hypothetical protein                                        |
| PA5470                                                                |               | 7,1         | 2,3         | 3,0           | 1       | probable peptide chain release factor                       |
| PA5471                                                                | <i>armZ</i>   | 4,1         | 2,2         | 2,5           | 2       | MexZ anti-repressor                                         |
| <b>Selected phage-related genes and pyocins</b>                       |               |             |             |               |         |                                                             |
| PA0610                                                                | <i>prtN</i>   |             | 2,8         | 5,4           | 1       | transcriptional regulator PrtN                              |
| PA0612                                                                | <i>ptrB</i>   |             | 6,5         | 10,6          | 1       | repressor PtrB                                              |
| PA0907                                                                | <i>alpA</i>   |             | 3,4         | 4,3           |         | transcriptional regulator                                   |
| PA0985                                                                | <i>pyoS5</i>  |             | 3,6         | 5,0           | 1       | pyocin S5                                                   |
| PA1150                                                                | <i>pys2</i>   |             | 2,9         | 4,1           | 1       | pyocin S2                                                   |
| PA3866                                                                |               |             | 2,6         | 4,1           | 1       | Pyocin S4                                                   |
| <b>Genes related to type VI export</b>                                |               |             |             |               |         |                                                             |
| PA0083                                                                | <i>hsiB1</i>  |             | 2,0         | 2,3           | 2       | sheath protein, Hcp secretion island I                      |
| PA0084                                                                | <i>tssC1</i>  |             | 2,2         | 2,1           | 2       | TssC1, Hcp secretion island I                               |
| PA0085                                                                | <i>hcp1</i>   |             | 2,3         | 2,2           | 2       | Hcp1, Type VI secretion system effector                     |
| PA0087                                                                | <i>tssE1</i>  |             |             | 2,2           | 2       | component of Hcp secretion island I                         |
| PA0089                                                                | <i>tssG1</i>  |             | 2,2         | 2,5           | 2       | component of Hcp secretion island I                         |
| PA0090                                                                | <i>clpV1</i>  |             | 2,7         | 2,7           | 2       | putative ATPase, Hcp secretion island I                     |
| PA0091                                                                | <i>vgrG1a</i> |             | 2,6         | 2,8           | 2       | component of Hcp secretion island I                         |
| PA0095                                                                | <i>vgrG1b</i> |             | 2,1         |               | 4       | secreted protein of unknown function                        |
| PA1844                                                                | <i>tse1</i>   |             |             | 2,0           | 1       | toxin                                                       |
| PA1845                                                                | <i>tsi1</i>   |             | 2,2         | 2,6           | 2       | immune protein                                              |
| <b>Genes regulated by BexR</b>                                        |               |             |             |               |         |                                                             |
| PA2432                                                                | <i>bexR</i>   |             | 8,4         | 7,9           | 2       | bistable expression regulator                               |
| PA2433                                                                |               |             | 3,4         | 4,5           | 1       | hypothetical protein                                        |
| PA1202                                                                |               |             | 6,9         | 5,8           | 2       | probable hydrolase                                          |
| PA1203                                                                |               |             | 3,3         | 3,2           | 2       | hypothetical protein                                        |
| PA1204                                                                |               |             | 2,3         | 2,2           | 2       | NAD(P)H quinone oxidoreductase                              |
| PA1205                                                                |               |             | 2,5         | 2,3           | 2       | conserved hypothetical protein                              |
| PA2698                                                                |               |             | 2,1         | 2,1           | 2       | probable hydrolase                                          |
| PA1337                                                                | <i>ansB</i>   |             |             | -2,0          | 6       | glutaminase-asparaginase                                    |
| PA1338                                                                | <i>ggt</i>    |             |             | -2,5          | 6       | gamma-glutamyltranspeptidase precursor                      |
| PA1340                                                                | <i>aatM</i>   |             |             | -2,8          | 6       | putative amino acid transporter                             |
| PA1341                                                                | <i>aatQ</i>   |             |             | -3,1          | 6       | putative amino acid transporter                             |
| <b>Genes involved in PQS synthesis</b>                                |               |             |             |               |         |                                                             |
| PA0996                                                                | <i>pqsA</i>   |             |             | -3,2          | 5       | PqsA, probable coenzyme A ligase                            |
| PA0997                                                                | <i>pqsB</i>   |             |             | -3,5          | 5       | PqsB, probable beta-keto-acyl-acyl-carrier protein synthase |
| PA0998                                                                | <i>pqsC</i>   |             | -2,0        | -3,5          | 5       | PqsC, probable beta-keto-acyl-acyl-carrier protein synthase |
| PA0999                                                                | <i>pqsD</i>   |             | -2,1        | -3,8          | 5       | 3-oxoacyl-[acyl-carrier-protein] synthase III               |

|                                                    |              |      |      |   |                                                     |
|----------------------------------------------------|--------------|------|------|---|-----------------------------------------------------|
| <i>PA1000</i>                                      | <i>pqsE</i>  | -2,4 | -3,7 | 5 | quinolone signal response protein                   |
| <i>PA1001</i>                                      | <i>phnA</i>  | -2,5 | -4,6 | 5 | anthranilate synthase component I                   |
| <i>PA1002</i>                                      | <i>phnB</i>  |      | -3,1 | 5 | anthranilate synthase component II                  |
| <i>PA1003</i>                                      | <i>mvfR</i>  |      | -2,2 | 5 | transcriptional regulator MvfR                      |
| <b>Pyochelin and pyoverdine biosynthesis genes</b> |              |      |      |   |                                                     |
| <i>PA4220</i>                                      |              | -2,0 |      | 5 | hypothetical protein                                |
| <i>PA4221</i>                                      | <i>fptA</i>  | -2,6 |      | 5 | Fe(III)-pyochelin outer membrane receptor precursor |
| <i>PA4224</i>                                      | <i>pchG</i>  | -2,6 | -2,5 | 6 | pyochelin biosynthetic protein PchG                 |
| <i>PA4225</i>                                      | <i>pchF</i>  | -2,4 | -2,9 | 6 | pyochelin synthetase                                |
| <i>PA4228</i>                                      | <i>pchD</i>  | -2,9 | -2,3 | 5 | pyochelin biosynthesis protein PchD                 |
| <i>PA4229</i>                                      | <i>pchC</i>  | -2,2 |      | 5 | pyochelin biosynthetic protein PchC                 |
| <i>PA4230</i>                                      | <i>pchB</i>  | -2,4 | -2,1 | 6 | salicylate biosynthesis protein PchB                |
| <i>PA4231</i>                                      | <i>pchA</i>  | -2,5 | -2,3 | 5 | salicylate biosynthesis isochorismate synthase      |
| <i>PA2384</i>                                      |              | -3,0 |      | 6 | transcriptional regulator                           |
| <i>PA2403</i>                                      |              | -3,1 |      | 6 | hypothetical protein                                |
| <i>PA2406</i>                                      |              | -2,7 | -3,2 | 6 | hypothetical protein                                |
| <i>PA2409</i>                                      |              | -3,0 | -2,8 | 6 | probable permease of ABC transporter                |
| <i>PA2410</i>                                      |              | -3,0 | -3,2 | 6 | hypothetical protein                                |
| <i>PA2411</i>                                      |              | -2,2 |      | 5 | probable thioesterase                               |
| <b>Transcriptional regulators</b>                  |              |      |      |   |                                                     |
| <i>PA0515</i>                                      |              | 3,1  | 3,0  | 4 | probable transcriptional regulator                  |
| <i>PA1196</i>                                      |              | 3,7  | 3,5  | 2 | probable transcriptional regulator                  |
| <i>PA2583</i>                                      |              |      | 2,3  | 1 | sensor/response regulator hybrid                    |
| <i>PA4659</i>                                      |              |      | 2,1  | 4 | probable transcriptional regulator                  |
| <i>PA4896</i>                                      |              | -2,1 |      | 5 | probable sigma-70 factor, ECF subfamily             |
| <b>Genes adjacent to <i>parS1-4</i></b>            |              |      |      |   |                                                     |
| <i>PA0004</i>                                      | <i>gyrB</i>  |      | -2,0 | 6 | DNA gyrase subunit B                                |
| <i>PA0005</i>                                      | <i>lptA</i>  |      | -2,1 | 6 | lysophosphatidic acid acyltransferase, LptA         |
| <i>PA0006</i>                                      |              |      | -2,1 | 6 | conserved hypothetical protein                      |
| <i>PA0008</i>                                      | <i>glyS</i>  |      | -3,1 | 6 | glycyl-tRNA synthetase beta chain                   |
| <i>PA0009</i>                                      | <i>glyQ</i>  |      | -2,5 | 6 | glycyl-tRNA synthetase alpha chain                  |
| <i>PA0011</i>                                      | <i>htrBI</i> | -2,7 | -4,9 | 6 | 2-OH-lauroyltransferase                             |
| <i>PA0012</i>                                      |              | -2,6 | -3,7 | 6 | hypothetical protein                                |
| <i>PA0013</i>                                      |              | -3,4 | -3,5 | 6 | conserved hypothetical protein                      |
| <b>Genes adjacent to <i>parS6</i></b>              |              |      |      |   |                                                     |
| <i>PA0492</i>                                      |              | -6,7 | -2,8 | 6 | conserved hypothetical protein                      |
| <i>PA0493</i>                                      |              | -4,3 | -2,4 | 6 | probable biotin-requiring enzyme                    |
| <i>PA0494</i>                                      |              | -3,0 | -2,2 | 6 | probable acyl-CoA carboxylase subunit               |
| <i>PA0495</i>                                      |              | -3,6 | -2,1 | 6 | hypothetical protein                                |

414

415 A remarkable feature of clusters 1 and 2, comprising the majority of ParB -upregulated  
 416 genes (Table S3), is a high proportion of phage-related genes (*PA0610*, *PA0612-0641*,  
 417 *PA0643-0648*, *PA0717*, *PA0718*, *PA0907*, *PA0909-0911*) as well as pyocin-encoding genes  
 418 (*PA0985*, *PA1150*, *PA3866*). Induction of bacteriophage genes and pyocin production in *P.*

419 *aeruginosa* have been shown to be a hallmark of the SOS response [62], suggesting that *parB*  
420 overexpression induces a DNA damage signal. In this bacterium SOS response is coordinated  
421 not only by LexA (*PA3007*), but also by two structurally related repressors, PrtR (*PA0611*)  
422 and AlpR (*PA0906*) [62,63]. Significantly, expression of none of these genes is affected by  
423 ParB excess. PrtR is an inhibitor of *prtN* (*PA0610*), a transcriptional activator of pyocin  
424 synthesis genes [64]. *prtN* is induced 5.4-fold in ParB+++ cells suggesting a relief of the  
425 PrtR-mediated repression in these cells. Similarly, genes controlled by AlpR (*PA0907*,  
426 *PA0909-PA0911*) are induced in response to ParB overproduction. Further studies are  
427 required to determine the effect on the expression of the PrtR- and AlpR- regulated genes  
428 apparently without a change in the amounts of transcript level of these two repressors.

429         The ParB excess also induces genes encoding components of the Hcp secretion island  
430 HSI-1 [65] (*PA0083-0085*, *PA0087*, *PA0089-0091*) and the toxin/immunity proteins TseI  
431 (*PA1844*) and TsiI (*PA1845*). The HSI-1 together with two other secretion islands participate  
432 in *P. aeruginosa* virulence, inter- and intraspecies antagonism, biofilm formation, and stress  
433 sensing [66].

434         Overexpression of *parB* also results in an 8-fold increase in the expression of the  
435 transcriptional regulatory gene *PA2432* encoding a bistable response regulator BexR [67]. Six  
436 genes, *PA1202*, *PA1203*, *PA1204*, *PA1205*, *PA2433* and *PA2698*, previously identified as  
437 upregulated in response to BexR overproduction [67], are also upregulated in ParB-  
438 overproducing strains. Similarly, five genes downregulated in response to BexR  
439 overproduction, *PA0998*, *PA1337*, *PA1338*, *PA1340* and *PA1341*, are also downregulated in  
440 the analysed ParB -overproducing cells (Table 4).

441         The expression of *bexR* gene is known to be bistable, meaning that this gene switches  
442 between OFF and ON states in cells of a genetically identical bacterial population [67]. The

443 microarray analysis was performed on three independent biological isolates of PAO1161  
444 (pKGB9 *araBADp-parB*) and all demonstrated a strong induction of *bexR* (PA2432)  
445 expression (*p*-value 3E-06) strongly suggesting that ParB excess modulates the BexR regulon  
446 through induction of *bexR* expression. To monitor the effect of ParB excess on promoter of  
447 *bexR* the strain PAO1161::*bexRp-lacZ* was constructed with the promoter-reporter cassette  
448 inserted in a non-coding region of the genome. A single colony (white on L agar with X-gal)  
449 was inoculated and the cells were used as the recipients in conjugation with either S17-1  
450 (pKGB8) or S17-1 (pKGB9 *araBADp-parB*). Conjugants were plated on selective medium  
451 containing X-gal to visualize the expression of *bexRp-lacZ* transcriptional fusion. Conjugants  
452 PAO1161::*bexRp-lacZ* (pKGB8) formed typical white/transparent colonies with a very low  
453 frequency of blue ones (less than 0.1%) whereas majority of PAO1161::*bexRp-lacZ* (pKGB9)  
454 conjugants formed blue colonies (Fig 4), confirming that ParB induces *bexRp* expression.

455 **Fig 4. ParB excess induces the expression of chromosomal *bexRp-lacZ* transcriptional**  
456 **fusion.**

457 PAO1161::*bexRp-lacZ* strain contains *bexRp-lacZ* transcriptional fusion inserted in the  
458 intergenic region of PAO1161 genome. White colony from L agar with X-gal was inoculated  
459 and used as a recipient in conjugation with either S17-1 (pKGB8) or S17-1 (pKGB9  
460 *araBADp-parB*) donor cells. Conjugants were grown on selective L agar plates supplemented  
461 with X-gal. The photographs show representative plates of PAO1161::*bexRp-lacZ* with both  
462 plasmids.

463 Clusters 3 and 4 group 33 genes with mRNA level reduced in response to plasmid/  
464 chloramphenicol/ arabinose (EV) but then increased by ParB excess. Twelve of the 33 genes  
465 in this group belong to the PseudoCAP category carbon compounds catabolism (CCC) and  
466 eight genes to the amino acid biosynthesis and metabolism (AABM) category (Table S3). The



467 altered expression of genes from these categories suggests that ParB overproduction may  
468 interfere with primary metabolism as an adaptive measure. Interestingly, three out of four  
469 putative arabinose-dependent genes have also been classified into cluster 4. Additionally,  
470 cluster 4 contains two putative transcriptional regulators: *PA0515*, which is a part of the *nir*  
471 operon (denitrification operon), and *PA4659* with unknown function.

#### 472 **Genes downregulated in response to *parB* overexpression**

473 Clusters 5 (31 genes) and 6 (34 genes) contain genes downregulated in response to  
474 ParB overproduction but differ from each other by a moderate induction in EV cells seen in  
475 Cluster 5. This cluster contains all genes from two operons, *pqsABCDE* (*PA0996-1000*) and  
476 *phnAB* (*PA1001* and *PA1002*), involved in the production of *Pseudomonas* quinolone quorum  
477 sensing signal (PQS) [68,69]. Interestingly, the same cluster contains *PA1003* (*mvfR/pqsR*)  
478 which encodes a positive regulator of the both operons [70,71], suggesting that the  
479 downregulation of the *pqs* and *phn* operons is a direct result of lower *mvfR* expression.  
480 Interestingly, MvfR also acts as a negative regulator of type VI secretion system HSI-1 [66],  
481 components of which are upregulated in response to ParB excess (Table 4 and see above).

482 Five genes (*PA4220*, *PA4221*, *PA4228*, *PA4229*, *PA4231*) from Cluster 5 and three  
483 genes (*PA4224*, *PA4225*, *PA4230*) from Cluster 6 are involved in the biosynthesis and  
484 transport of a siderophore, pyochelin. Pyochelin synthesis in *P. aeruginosa* cells is positively  
485 regulated by the transcriptional regulator PA2384 [72], which is downregulated in ParB+  
486 cells. Interestingly, biosynthesis of another siderophore, pyoverdine, also seems to be  
487 negatively affected by ParB excess as the genes *PA2403*, *PA2406*, *PA2409* and *PA2410*  
488 (Cluster 6) from the pyoverdine biosynthesis operon are significantly downregulated in ParB-  
489 overproducing cells (Table 4).

#### 490 **Analysis of ParB-related transcriptional silencing around *parS* sites**

491 Analysis of the microarray data revealed that ParB overproduction reduces the  
492 expression of a number of genes in close proximity of *parS1-4* (Table 4). Closer inspection of  
493 the expression changes in this region revealed that genes *PA0003-PA0015*, with the exception  
494 of *PA0007*, *tag* (*PA0010*) and *PA0014*, show a significant (30%-80%,  $p$ -value  $<0.05$ ), ParB  
495 dose-dependent downregulation (Fig 5A). RT-qPCR analysis revealed that in fact all genes  
496 from *PA0004* to *PA0014* are subject to significant downregulation (Fig 5B), suggesting that  
497 ParB bound to *parS1-4* negatively influences the expression of adjacent genes. To verify this  
498 hypothesis we analysed the expression of these genes in the *parB<sub>null</sub>* mutant, which does not  
499 produce ParB [18], and in the *parS<sub>null</sub>* mutant in which the *parS1-4* sequences had been  
500 mutated, so the ParB binding to these sequences was impaired [38]. In the both mutants only  
501 genes from *PA0010* to *PA0015* displayed significantly increased expression (Fig 5C)  
502 indicating that at its native level ParB acts as a major negative regulator of genes adjacent to  
503 intergenic *parS3* and *parS4* but not for the genes adjacent to intragenic *parS1* and *parS2*.  
504 Regulation of the expression of genes in *parS1-parS4* region seems to be a direct consequence  
505 of ParB binding to *parS1-parS4* as ParB overproduction in *parS<sub>null</sub>* cells did not lower the  
506 expression of *dnaA-trkA* (*PA0001-PA0016*) genes relatively to the control *parS<sub>null</sub>* cells  
507 carrying empty vector (Fig 5D, also see below).

508 **Fig 5. Influence of ParB on gene expression in the *parS1-4* region.**

509 (A) Mean level of expression of *dnaA-def* (*PA0001-PA0019*) genes in ParB<sup>+</sup> and ParB<sup>+++</sup>  
510 cells relative to EV as revealed by microarray analysis. Filled markers indicate statistically  
511 different expression relative to EV ( $p$ -value  $< 0.05$  in ANOVA test). Arrangement of the  
512 genes in the chromosome is shown below. Operons (according to the DOOR 2.0 database  
513 [73]) are marked in grey. (B) Expression of *PA0001-PA0016* (*dnaA-trkA*) genes in ParB<sup>+</sup> and  
514 ParB<sup>+++</sup> cells relative to EV cells. (C) RT-qPCR analysis of expression of *dnaA-trkA* genes  
515 in *parB<sub>null</sub>* and *parS<sub>null</sub>* strains relative to WT cells. Cells were grown in L broth. (D) RT-

516 qPCR analysis of expression of *dnaA-trkA* genes in *parS*<sub>null</sub> (pKGB9 *araBADp-parB*) and  
517 *parS*<sub>null</sub> (pKGB8 *araBADp*) relative to EV [PAO1161 (pKGB8 *araBADp*)]. Cells were grown  
518 in L broth supplemented with chloramphenicol and 0.02% arabinose. RT-qPCR data represent  
519 mean  $\pm$ SD from three biological replicates. Filled symbols indicate significantly different  
520 expression ( $p$ -value  $< 0.05$  in two-sided Student's  $t$ -test assuming equal variance) relative to  
521 the control cells labelled as blue squares. The differences in expression of genes in *parS*<sub>null</sub>  
522 (pKGB9) strain relative to *parS*<sub>null</sub> (pKGB8) strain are not statistically significant.

523 A similar inspection of the expression changes in proximity ( $\pm 10$  adjacent genes) of  
524 the remaining six *parS* sequences [38] revealed that overproduction of ParB lowers the  
525 expression of genes adjacent to *parS6* (Fig 6A, *PA0492-PA0496*) but not to the other *parS*  
526 sequences (data not shown). These results were confirmed by RT-qPCR (data not shown).  
527 However, the expression of *PA0492*, *PA0493* and *PA0494* as assayed by RT-qPCR was not  
528 significantly changed in *parB*<sub>null</sub> or *parS*<sub>null</sub> cells in comparison with the WT strain (Fig 6B),  
529 indicating that at its native abundance ParB is not a major effector of genes in this region.

530 **Fig 6. Influence of ParB level on expression of genes adjacent to *parS6*.**

531 (A) Mean level of expression of *PA0488-PA0498* genes in ParB<sup>+</sup> and ParB<sup>+++</sup> cells relative  
532 to EV cells (microarray data). Filled markers indicate statistically different expression relative  
533 to EV ( $p$ -value  $< 0.05$  in ANOVA test). Operons (according to the DOOR 2.0 database [73])  
534 are labelled with different shades of grey. (B) RT-qPCR analysis of expression of *PA0492*,  
535 *PA0493* and *PA0494* genes in *parB*<sub>null</sub> and *parS*<sub>null</sub> strains relative to WT cells. Data represent  
536 mean  $\pm$ SD from three biological replicates. The differences between strains / conditions are  
537 not statistically significant ( $p$ -value  $> 0.05$  in two-sided Student's  $t$ -test assuming equal  
538 variance).

539 **Regulation of *PA0011* and *PA0013* promoters by ParB interactions with *parS3* and**  
540 ***parS4* sequences**

541 To further confirm that ParB binding to *parS3* and *parS4* affects the expression of  
542 adjacent genes the intergenic regions preceding *PA0011* and *PA0013* and their respective  
543 variants carrying mutated *parS3* and *parS4* (Fig 7A) [38] were cloned upstream of a  
544 promoter-less *lacZ* cassette in pPJB132, a derivative of pCM132 [50]. To produce an excess  
545 of ParB from the chromosome strain PAO1161::*araBADp-flag-parB* was constructed with the  
546 expression cassette inserted in a non-coding region of the genome (Table 1). Growth of the  
547 PAO1161::*araBADp-flag-parB* cells in a medium containing 0.1% arabinose results in the  
548 overproduction of Flag-ParB to a level that is not toxic for the cells (data not shown). All four  
549 pPJB132 derivatives were introduced into PAO1161::*araBADp-flag-parB* as well as into  
550 control strain PAO1161::*araBADp* with the empty expression cassette inserted in the same  
551 genomic position.

552 Analysis of the  $\beta$ -galactosidase activity in the transformants of the control strain  
553 revealed no effect of 0.1% arabinose on the promoters tested (Fig 7B). The nucleotide  
554 substitutions in *parS3* modifications (Fig 7A) did not affect the *PA0011p* activity (Fig 7B).  
555 Surprisingly, replacing *parS4* by a NcoI restriction site (deletion of 10 bp) resulted in a minor  
556 increase of the promoter strength in the *PA0013p<sub>parS4mut</sub>-lacZ* fusion (Fig 7B). DNA sequence  
557 analysis of promoters' regions does not give a clear explanation of such effect (Fig 7A). The  
558  $\beta$ -galactosidase activities detected in transformants of PAO1161::*araBADp-flag-parB* were  
559 similar to those in the corresponding control strain and when the strains were grown without  
560 arabinose. However, upon induction of *flag-parB* expression with 0.1% arabinose a reduction  
561 of  $\beta$ -galactosidase activity was observed in PAO1161::*araBADp-flag-parB* transformants  
562 carrying plasmids with the *PA0011p-lacZ* and *PA0013p-lacZ* transcriptional fusions but not  
563 plasmids with the *PA0011p<sub>parS3mut</sub>-lacZ* or *PA0013p<sub>parS4mut</sub>-lacZ* transcriptional fusions (Fig

564 7C). These data confirmed that ParB negatively regulates expression of these two promoters  
565 *in vivo* through interactions with *parS* sites.

566 **Fig 7. Influence of ParB on the activities of PA0011 and PA0013 promoters.**

567 (A) DNA sequences preceding PA0011 (PA0011p) and PA0013 (PA0013p) and their mutated  
568 versions, PA0011p<sub>parS3mut</sub> and PA0013p<sub>parS4mut</sub>, cloned upstream of promoter-less *lacZ* cassette  
569 in pPJB132 are presented. Putative promoters' motifs, RBS sequences and start codons are  
570 indicated. Promoter -35 and -10 boxes were predicted using BPPROM [74].  $\beta$ -galactosidase  
571 activity was measured in extracts from PAO1161::*araBADp* (control strain) (B) and  
572 PAO1161::*araBADp-flag-parB* (ParB-overproducing strain) (C) cells carrying pPJB132  
573 derivatives as indicated. Data represent mean activity from at least three cultures  $\pm$ SD. \* - *p*-  
574 value < 0.05 in two-sided Student's *t*-test assuming equal variance.

575 **Discussion**

576 In *P. aeruginosa*, partitioning protein ParB plays a non-essential but important role in  
577 segregation of chromosomes. Its binding to at least one of the four *parS* sequences in the  
578 *parS1-4* cluster, closest to *oriC*, is necessary and sufficient for accurate segregation [33,38].  
579 The role of the remaining six *parS* sequences (four in the *ori* domain and two, *parS7* and  
580 *parS8*, close to the terminus domain [38]) is not fully understood. Ten similarly distributed  
581 *parS* sequences in *B. subtilis* have been shown to participate in SMC recruitment,  
582 condensation and juxtapositioning of chromosome arms [75]. Several reports have indicated  
583 that partitioning proteins may also modulate transcription of certain genes [34,36] but *P.*  
584 *aeruginosa* seems to be unique, as inactivation of *parA* or *parB* leads to large-scale changes  
585 of its transcriptome [39]. A lack or an excess of ParB protein is manifested by similar  
586 phenotypic changes, including erratic chromosome segregation, increased rate of formation of  
587 anucleate cells, cell elongation, disturbed division and defects in swarming and swimming

588 [17,18,37]. To find out how such multiple effects arise, a microarray-based transcriptomic  
589 analysis was performed of PAO1161 derivatives in which ParB level was increased either 2-  
590 or 5- fold in comparison with the strain carrying empty vector. Since after binding to a  
591 specific *parS* sequence ParB has the ability to spread on the adjacent DNA, we mainly  
592 focused on expression of genes in the vicinity of *parS* sequences.

593         At tested ParB concentrations its binding to *parS* sites has no pronounced effect on  
594 expression of genes around them with the exception of genes located in proximity of *parS1-4*  
595 and *parS6*. Microarray and RT-qPCR data show convincingly that all the genes adjacent to  
596 *parS1-4* (*PA0003* to *PA0015*) are downregulated in the presence of ParB excess (Fig 3A and  
597 B). The interference of ParB with the expression of a vital replication operon (*dnaA-dnaN-  
598 recF-gyrB*), likely caused by ParB binding to *parS1/parS2* sites within the *recF* gene, may  
599 underlie the defects in cell division caused by a ParB excess larger than studied here. In  
600 contrast, in cells lacking a functional ParB protein or carrying mutated *parS1-4* sequences  
601 unable to bind ParB, RT-qPCR analysis revealed only upregulation of *PA0010-PA0015* genes,  
602 located in proximity of the intergenic *parS3* and *parS4*. Linking the regions preceding  
603 *PA0011* and *PA0013* to the promoter-less *lacZ* cassette confirmed the presence of functional  
604 promoters in the cloned fragments. Both promoters were repressed by ParB excess provided  
605 functional *parS3* and *parS4* were present, which confirmed that ParB binding directly affects  
606 transcription in this region.

607         The product of *PA0011*, the 2-OH-lauroyltransferase HtrB1 is involved in lipid A  
608 biosynthesis important for integrity of the outer membrane and cell envelope [76–78]. *htrB1*  
609 expression is induced by sub-inhibitory concentrations of different antibiotics [78] or growth  
610 at low temperature [77]. Inactivation of *htrB1* leads to pleiotropic effects, manifested by  
611 increased susceptibility to surfactants and antibiotics, impaired swarming motility, growth  
612 defects and induction of type III secretion system. Some of these effects are also observed

613 under ParB excess. Conversely, expression of another HtrB homolog (*PA3242*) is  
614 significantly reduced in *parB*<sub>null</sub> mutant [39]. Since inactivation of either of the *htrB* genes in  
615 *P. aeruginosa* PAO1 leads to motility defects [77,79], this could explain the impaired motility  
616 seen both when ParB is missing and when it is present in excess. Notably, also other genes  
617 adjacent to *parS3* and *parS4* encode proteins with putative roles in response to cellular stress.  
618 *tag* (*PA0010*) encodes a putative 3-methyladenine glycosidase I [80]. *PA0012* encodes a  
619 protein with a predicted PilZ domain, which could bind cyclic di-GMP, an important  
620 signalling molecule in *P. aeruginosa* [81,82]. Further studies are needed to characterize the  
621 biological functions of all the genes adjacent to *parS3* and *parS4* and the role of ParB in their  
622 regulation.

623         Apart from the genes in proximity to *parS3*/*-parS4*, also those close to *parS6* showed a  
624 reduced expression in response to ParB excess, however, their expression was not altered in  
625 *parB*<sub>null</sub> and *parS*<sub>null</sub> strains, suggesting that here the ParB involvement is a part of a more  
626 complex regulatory circuit. No changes were observed in the transcription of genes adjacent  
627 to *parS5* and *parS7*-*parS10* upon ParB excess. Indeed, a recent ChIP-seq analysis did not  
628 indicate binding of ParB to these sequences *in vivo* in cells grown in minimal medium [33],  
629 but instead showed the presence of nine additional ParB-bound sites. However, none of the  
630 genes adjacent to those regions changed expression in response to ParB excess in cells grown  
631 in conditions tested here (data not shown). It is likely that the interaction of ParB with such  
632 secondary ParB binding sites, which is not required for chromosome segregation, may  
633 strongly depend on experimental conditions. It would be therefore interesting to compare  
634 ParB ChIP data obtained for cells grown in minimal vs. rich medium.

635         A comparison of the transcriptional changes in *parB* -deficient cells and cells  
636 expressing ParB excess identified 87 genes found in both studies (Table S4) [39]. Expression  
637 of 83 genes similarly responded to either lack or abundance of ParB. Majority of them seem

638 to be involved in the stress adaptation. Only *PA0293*, *PA1894*, *PA2113* and *PA2792* showed  
639 opposite trends of the response. These four genes are downregulated in *parB* -deficient cells  
640 and upregulated in response to ParB excess, hence it is unlikely that, akin to genes in the  
641 proximity of *parS3* and *parS4*, ParB directly affects their expression.

642 Our data indicate that ParB excess downregulates two operons *pqsABCDE* and *phnAB*  
643 involved in quinolone quorum sensing signalling [68,69], probably indirectly by repressing  
644 *PA1003* (*mvfR/pqsR*) coding for a transcriptional activator of the both operons [70,71].  
645 Additionally, the ParB excess interferes with expression of key virulence determinants, two  
646 pathways involved in the production of the siderophores pyochelin and pyoverdine.

647 The extreme adaptability and excellent survival of *Pseudomonas* species have been  
648 claimed to originate from the plasticity of gene expression facilitated by the high number of  
649 transcriptional regulators encoded in their genomes [83,84]. ParB excess leads to the  
650 induction of several genes encoding known and putative transcriptional regulators (Table 4).  
651 Among them is *PA2432* encoding the bistable response regulator BexR [67]. Bistability refers  
652 to a phenotypic heterogeneity within an isogenic population which allows a fraction of cells to  
653 survive in otherwise lethal conditions [85]. The BexR regulon comprises a diverse set of up-  
654 and down- regulated genes related to virulence and quorum sensing [67]. Importantly, the  
655 *bexR* induction in response to ParB excess is highly reproducible and approaches the ~10-fold  
656 induction maximum found in the subset of cells which have switched on the BexR regulon  
657 [67]. The mobilization of pKGB9 (*araBADp-parB*) and pKGB8 (*araBADp*) plasmids into the  
658 test strain PAO1161::*bexRp-lacZ* with “OFF” phenotype demonstrated “ON” state of *bexRp*  
659 in nearly all conjugants with pKGB9 and in a tiny fraction of conjugants with pKGB8  
660 (<0.1%). This confirms that the ParB excess induces the *bexR* gene in all cells rather than in a  
661 specific subpopulation only. So far the mechanism of *bexR* induction in response to ParB  
662 excess remains unknown.



663 Our study also revealed that ParB excess leads to the induction of bacteriophage and  
664 pyocin encoding genes, which in *P. aeruginosa* are hallmarks of the SOS response [62,86].  
665 Whereas the SOS response had initially been linked exclusively to DNA damage signals, it  
666 was later established to be part of a broad stress reaction [87,88]. SOS response is tightly  
667 connected to cell growth inhibition, cell-cycle checkpoints and even programmed cell death  
668 [89–91]. The phage- and pyocins-related genes are among the genes responding similarly to  
669 the *parB* deficiency and ParB excess (Table S4), suggesting that any imbalance in the  
670 ParA/ParB/*parS* system may trigger SOS response.

671 Altogether, our data indicate that the level of partitioning protein ParB in *P.*  
672 *aeruginosa* influences the expression of numerous genes including those involved in  
673 virulence, stress response and quorum sensing. Further studies are needed to decipher whether  
674 these effects are a direct result of ParB binding to DNA (specific or non-specific), interactions  
675 with other proteins or are caused indirectly, for example by topological changes.

## 676 **Acknowledgements**

677 We thank dr Paulina Jęcz for the construction of pPJB132. This work was supported by the  
678 Polish National Science Centre grant no 2013/11/B/NZ2/02555 awarded to GJB.

## 679 **References**

- 680 1. Salje J. Plasmid segregation: how to survive as an extra piece of DNA. Crit Rev  
681 Biochem Mol Biol. 2010;45: 296–317. doi:10.3109/10409238.2010.494657
- 682 2. Baxter JC, Funnell BE. Plasmid partition mechanisms. Microbiol Spectr. 2014;2.  
683 doi:10.1128/microbiolspec.PLAS-0023-2014
- 684 3. Gerdes K, Howard M, Szardenings F. Pushing and pulling in prokaryotic DNA  
685 segregation. Cell. 2010;141: 927–942. doi:10.1016/j.cell.2010.05.033

- 686 4. Gerdes K, Møller-Jensen J, Jensen RB. Plasmid and chromosome partitioning: surprises  
687 from phylogeny. *Mol Microbiol.* 2000;37: 455–466. doi:10.1046/j.1365-  
688 2958.2000.01975.x
- 689 5. Funnell BE. ParB partition proteins: complex formation and spreading at bacterial and  
690 plasmid centromeres. *Mol Recognit.* 2016; 44. doi:10.3389/fmolb.2016.00044
- 691 6. Yamaichi Y, Niki H. Active segregation by the *Bacillus subtilis* partitioning system in  
692 *Escherichia coli*. *Proc Natl Acad Sci.* 2000;97: 14656–14661.  
693 doi:10.1073/pnas.97.26.14656
- 694 7. Livny J, Yamaichi Y, Waldor MK. Distribution of centromere-like *parS* sites in bacteria:  
695 insights from comparative genomics. *J Bacteriol.* 2007;189: 8693–8703.  
696 doi:10.1128/JB.01239-07
- 697 8. Mohl DA, Gober JW. Cell cycle–dependent polar localization of chromosome  
698 partitioning proteins in *Caulobacter crescentus*. *Cell.* 1997;88: 675–684.  
699 doi:10.1016/S0092-8674(00)81910-8
- 700 9. Iniesta AA. ParABS system in chromosome partitioning in the bacterium *Myxococcus*  
701 *xanthus*. *PLOS ONE.* 2014;9: e86897. doi:10.1371/journal.pone.0086897
- 702 10. Ireton K, Gunther NW, Grossman AD. Spo0J is required for normal chromosome  
703 segregation as well as the initiation of sporulation in *Bacillus subtilis*. *J Bacteriol.*  
704 1994;176: 5320–5329.
- 705 11. Sharpe ME, Errington J. The *Bacillus subtilis* *soj-spo0J* locus is required for a  
706 centromere-like function involved in prespore chromosome partitioning. *Mol Microbiol.*  
707 1996;21: 501–509. doi:10.1111/j.1365-2958.1996.tb02559.x

- 708 12. Lewis PJ, Errington J. Direct evidence for active segregation of *oriC* regions of the  
709 *Bacillus subtilis* chromosome and co-localization with the Spo0J partitioning protein.  
710 Mol Microbiol. 1997;25: 945–954.
- 711 13. Lin DC-H, Grossman AD. Identification and characterization of a bacterial chromosome  
712 partitioning site. Cell. 1998;92: 675–685. doi:10.1016/S0092-8674(00)81135-6
- 713 14. Kim HJ, Calcutt MJ, Schmidt FJ, Chater KF. Partitioning of the linear chromosome  
714 during sporulation of *Streptomyces coelicolor* A3(2) involves an *oriC*-linked *parAB*  
715 locus. J Bacteriol. 2000;182: 1313–1320.
- 716 15. Fogel MA, Waldor MK. A dynamic, mitotic-like mechanism for bacterial chromosome  
717 segregation. Genes Dev. 2006;20: 3269–3282. doi:10.1101/gad.1496506
- 718 16. Saint-Dic D, Frushour BP, Kehrl JH, Kahng LS. A *parA* homolog selectively influences  
719 positioning of the large chromosome origin in *Vibrio cholerae*. J Bacteriol. 2006;188:  
720 5626–5631. doi:10.1128/JB.00250-06
- 721 17. Bartosik AA, Mierzejewska J, Thomas CM, Jagura-Burdzy G. ParB deficiency in  
722 *Pseudomonas aeruginosa* destabilizes the partner protein ParA and affects a variety of  
723 physiological parameters. Microbiology. 2009;155: 1080–1092.  
724 doi:10.1099/mic.0.024661-0
- 725 18. Lasocki K, Bartosik AA, Mierzejewska J, Thomas CM, Jagura-Burdzy G. Deletion of  
726 the *parA* (*soj*) homologue in *Pseudomonas aeruginosa* causes ParB instability and  
727 affects growth rate, chromosome segregation, and motility. J Bacteriol. 2007;189: 5762–  
728 5772. doi:10.1128/JB.00371-07

- 729 19. Vallet-Gely I, Boccard F. Chromosomal organization and segregation in *Pseudomonas*  
730 *aeruginosa*. PLOS Genet. 2013;9: e1003492. doi:10.1371/journal.pgen.1003492
- 731 20. Gruber S, Errington J. Recruitment of condensin to replication origin regions by  
732 ParB/Spo0J promotes chromosome segregation in *B. subtilis*. Cell. 2009;137: 685–696.  
733 doi:10.1016/j.cell.2009.02.035
- 734 21. Sullivan NL, Marquis KA, Rudner DZ. Recruitment of SMC by ParB-*parS* organizes the  
735 origin region and promotes efficient chromosome segregation. Cell. 2009;137: 697–707.  
736 doi:10.1016/j.cell.2009.04.044
- 737 22. Minnen A, Attaiech L, Thon M, Gruber S, Veening J-W. SMC is recruited to *oriC* by  
738 ParB and promotes chromosome segregation in *Streptococcus pneumoniae*. Mol  
739 Microbiol. 2011;81: 676–688. doi:10.1111/j.1365-2958.2011.07722.x
- 740 23. Lee PS, Grossman AD. The chromosome partitioning proteins Soj (ParA) and Spo0J  
741 (ParB) contribute to accurate chromosome partitioning, separation of replicated sister  
742 origins, and regulation of replication initiation in *Bacillus subtilis*. Mol Microbiol.  
743 2006;60: 853–869. doi:10.1111/j.1365-2958.2006.05140.x
- 744 24. Murray H, Errington J. Dynamic control of the DNA replication initiation protein DnaA  
745 by Soj/ParA. Cell. 2008;135: 74–84. doi:10.1016/j.cell.2008.07.044
- 746 25. Scholefield G, Whiting R, Errington J, Murray H. Spo0J regulates the oligomeric state of  
747 Soj to trigger its switch from an activator to an inhibitor of DNA replication initiation.  
748 Mol Microbiol. 2011;79: 1089–1100. doi:10.1111/j.1365-2958.2010.07507.x

- 749 26. Figge RM, Easter J, Gober JW. Productive interaction between the chromosome  
750 partitioning proteins, ParA and ParB, is required for the progression of the cell cycle in  
751 *Caulobacter crescentus*. *Mol Microbiol.* 2003;47: 1225–1237.
- 752 27. Hajduk IV, Rodrigues CDA, Harry EJ. Connecting the dots of the bacterial cell cycle:  
753 coordinating chromosome replication and segregation with cell division. *Semin Cell Dev*  
754 *Biol.* 2016;53: 2–9. doi:10.1016/j.semcdb.2015.11.012
- 755 28. Donczew M, Mackiewicz P, Wróbel A, Flärdh K, Zakrzewska-Czerwińska J,  
756 Jakimowicz D. ParA and ParB coordinate chromosome segregation with cell elongation  
757 and division during *Streptomyces sporulation*. *Open Biol.* 2016;6: 150263.  
758 doi:10.1098/rsob.150263
- 759 29. Murray H, Ferreira H, Errington J. The bacterial chromosome segregation protein Spo0J  
760 spreads along DNA from *parS* nucleation sites. *Mol Microbiol.* 2006;61: 1352–1361.  
761 doi:10.1111/j.1365-2958.2006.05316.x
- 762 30. Broedersz CP, Wang X, Meir Y, Loparo JJ, Rudner DZ, Wingreen NS. Condensation  
763 and localization of the partitioning protein ParB on the bacterial chromosome. *Proc Natl*  
764 *Acad Sci.* 2014;111: 8809–8814. doi:10.1073/pnas.1402529111
- 765 31. Graham TGW, Wang X, Song D, Etsen CM, Oijen AM van, Rudner DZ, et al. ParB  
766 spreading requires DNA bridging. *Genes Dev.* 2014; doi:10.1101/gad.242206.114
- 767 32. Taylor JA, Pastrana CL, Butterer A, Pernstich C, Gwynn EJ, Sobott F, et al. Specific and  
768 non-specific interactions of ParB with DNA: implications for chromosome segregation.  
769 *Nucleic Acids Res.* 2015;43: 719–731. doi:10.1093/nar/gku1295

- 770 33. Lagage V, Boccard F, Vallet-Gely I. Regional control of chromosome segregation in  
771 *Pseudomonas aeruginosa*. PLOS Genet. 2016;12: e1006428.  
772 doi:10.1371/journal.pgen.1006428
- 773 34. Baek JH, Rajagopala SV, Chatteraj DK. Chromosome segregation proteins of *Vibrio*  
774 *cholerae* as transcription regulators. mBio. 2014;5: e01061-14.  
775 doi:10.1128/mBio.01061-14
- 776 35. Breier AM, Grossman AD. Whole-genome analysis of the chromosome partitioning and  
777 sporulation protein Spo0J (ParB) reveals spreading and origin-distal sites on the *Bacillus*  
778 *subtilis* chromosome. Mol Microbiol. 2007;64: 703–718. doi:10.1111/j.1365-  
779 2958.2007.05690.x
- 780 36. Attaiech L, Minnen A, Kjos M, Gruber S, Veening J-W. The ParB-*parS* chromosome  
781 segregation system modulates competence development in *Streptococcus pneumoniae*.  
782 mBio. 2015;6: e00662-15. doi:10.1128/mBio.00662-15
- 783 37. Bartosik AA, Lasocki K, Mierzejewska J, Thomas CM, Jagura-Burdzy G. ParB of  
784 *Pseudomonas aeruginosa*: interactions with its partner ParA and its target *parS* and  
785 specific effects on bacterial growth. J Bacteriol. 2004;186: 6983–6998.  
786 doi:10.1128/JB.186.20.6983-6998.2004
- 787 38. Jecz P, Bartosik AA, Glabski K, Jagura-Burdzy G. A Single *parS* Sequence from the  
788 cluster of four sites closest to *oriC* is necessary and sufficient for proper chromosome  
789 segregation in *Pseudomonas aeruginosa*. PLOS ONE. 2015;10: e0120867.  
790 doi:10.1371/journal.pone.0120867
- 791 39. Bartosik AA, Glabski K, Jecz P, Mikulska S, Fogtman A, Koblovska M, et al.  
792 Transcriptional profiling of ParA and ParB Mutants in actively dividing cells of an

- 793 opportunistic human pathogen *Pseudomonas aeruginosa*. PLOS ONE. 2014;9: e87276.  
794 doi:10.1371/journal.pone.0087276
- 795 40. Kusiak M, Gapczynska A, Plochocka D, Thomas CM, Jagura-Burdzy G. Binding and  
796 spreading of ParB on DNA determine its biological function in *Pseudomonas*  
797 *aeruginosa*. J Bacteriol. 2011;193: 3342–3355. doi:10.1128/JB.00328-11
- 798 41. Mierzejewska J, Bartosik AA, Macioszek M, Plochocka D, Thomas CM, Jagura-Burdzy  
799 G. Identification of C-terminal hydrophobic residues important for dimerization and all  
800 known functions of ParB of *Pseudomonas aeruginosa*. Microbiol Read Engl. 2012;158:  
801 1183–1195. doi:10.1099/mic.0.056234-0
- 802 42. Miller JH. Experiments in molecular genetics. 1972; Cold Spring Harbor Laboratory  
803 Press, Cold Spring Harbor, NY
- 804 43. Hanahan D. Studies on transformation of *Escherichia coli* with plasmids. J Mol Biol.  
805 1983;166: 557–580. doi:10.1016/S0022-2836(83)80284-8
- 806 44. Simon R, Priefer U, Pühler A. A broad host range mobilization system for in vivo  
807 genetic engineering: transposon mutagenesis in gram negative bacteria. Nat Biotechnol.  
808 1983;1: 784–791. doi:10.1038/nbt1183-784
- 809 45. Irani VR, Rowe JJ. Enhancement of transformation in *Pseudomonas aeruginosa* PAO1  
810 by Mg<sup>2+</sup> and heat. BioTechniques. 1997;22: 54–56.
- 811 46. Sambrook J, Fritsch EF, Maniatis T. Molecular cloning: a laboratory manual. Cold  
812 Spring Harbor Laboratory; 1989.
- 813 47. Ludwiczak M, Dolowy P, Markowska A, Szarlak J, Kulinska A, Jagura-Burdzy G.  
814 Global transcriptional regulator KorC coordinates expression of three backbone modules

- 815 of the broad-host-range RA3 plasmid from IncU incompatibility group. *Plasmid*.  
816 2013;70: 131–145. doi:10.1016/j.plasmid.2013.03.007
- 817 48. El-Sayed AK, Hothersall J, Thomas CM. Quorum-sensing-dependent regulation of  
818 biosynthesis of the polyketide antibiotic mupirocin in *Pseudomonas fluorescens* NCIMB  
819 10586. *Microbiology*. 2001;147: 2127–2139. doi:10.1099/00221287-147-8-2127
- 820 49. Guzman LM, Belin D, Carson MJ, Beckwith J. Tight regulation, modulation, and high-  
821 level expression by vectors containing the arabinose PBAD promoter. *J Bacteriol*.  
822 1995;177: 4121–4130.
- 823 50. Marx CJ, Lidstrom ME. Development of improved versatile broad-host-range vectors  
824 for use in methylotrophs and other Gram-negative bacteria. *Microbiol Read Engl*.  
825 2001;147: 2065–2075. doi:10.1099/00221287-147-8-2065
- 826 51. Reece KS, Phillips GJ. New plasmids carrying antibiotic-resistance cassettes. *Gene*.  
827 1995;165: 141–142. doi:10.1016/0378-1119(95)00529-F
- 828 52. Soukas A, Cohen P, Succi ND, Friedman JM. Leptin-specific patterns of gene  
829 expression in white adipose tissue. *Genes Dev*. 2000;14: 963–980.  
830 doi:10.1101/gad.14.8.963
- 831 53. Saeed AI, Sharov V, White J, Li J, Liang W, Bhagabati N, et al. TM4: a free, open-  
832 source system for microarray data management and analysis. *BioTechniques*. 2003;34:  
833 374–378.
- 834 54. Pfaffl MW. A new mathematical model for relative quantification in real-time RT-PCR.  
835 *Nucleic Acids Res*. 2001;29: e45.



- 836 55. O'Toole GA, Kolter R. Initiation of biofilm formation in *Pseudomonas fluorescens*  
837 WCS365 proceeds via multiple, convergent signalling pathways: a genetic analysis. *Mol*  
838 *Microbiol.* 1998;28: 449–461. doi:10.1046/j.1365-2958.1998.00797.x
- 839 56. Kovach ME, Elzer PH, Hill DS, Robertson GT, Farris MA, Roop RM, et al. Four new  
840 derivatives of the broad-host-range cloning vector pBBR1MCS, carrying different  
841 antibiotic-resistance cassettes. *Gene.* 1995;166: 175–176.
- 842 57. Winsor GL, Lo R, Ho Sui SJ, Ung KSE, Huang S, Cheng D, et al. *Pseudomonas*  
843 *aeruginosa* genome database and PseudoCAP: facilitating community-based, continually  
844 updated, genome annotation. *Nucleic Acids Res.* 2005;33: D338-343.  
845 doi:10.1093/nar/gki047
- 846 58. Yamamoto M, Ueda A, Kudo M, Matsuo Y, Fukushima J, Nakae T, et al. Role of MexZ  
847 and PA5471 in transcriptional regulation of *mexXY* in *Pseudomonas aeruginosa*.  
848 *Microbiology.* 2009;155: 3312–3321. doi:10.1099/mic.0.028993-0
- 849 59. Hay T, Fraud S, Lau CH-F, Gilmour C, Poole K. Antibiotic inducibility of the *mexXY*  
850 multidrug efflux operon of *Pseudomonas aeruginosa*: involvement of the MexZ anti-  
851 repressor ArmZ. *PLoS ONE.* 2013;8: e56858. doi:10.1371/journal.pone.0056858
- 852 60. Mac Aogáin M, Mooij MJ, McCarthy RR, Plower E, Wang YP, Tian ZX, et al. The non-  
853 classical ArsR-family repressor PyeR (PA4354) modulates biofilm formation in  
854 *Pseudomonas aeruginosa*. *Microbiol Read Engl.* 2012;158: 2598–2609.  
855 doi:10.1099/mic.0.058636-0
- 856 61. Hoffman LR, D'Argenio DA, MacCoss MJ, Zhang Z, Jones RA, Miller SI.  
857 Aminoglycoside antibiotics induce bacterial biofilm formation. *Nature.* 2005;436: 1171–  
858 1175. doi:10.1038/nature03912

- 859 62. Cirz RT, O'Neill BM, Hammond JA, Head SR, Romesberg FE. Defining the  
860 *Pseudomonas aeruginosa* SOS response and its role in the global response to the  
861 antibiotic ciprofloxacin. *J Bacteriol.* 2006;188: 7101–7110. doi:10.1128/JB.00807-06
- 862 63. McFarland KA, Dolben EL, LeRoux M, Kambara TK, Ramsey KM, Kirkpatrick RL, et  
863 al. A self-lysis pathway that enhances the virulence of a pathogenic bacterium. *Proc Natl*  
864 *Acad Sci.* 2015;112: 8433–8438. doi:10.1073/pnas.1506299112
- 865 64. Matsui H, Sano Y, Ishihara H, Shinomiya T. Regulation of pyocin genes in  
866 *Pseudomonas aeruginosa* by positive (*priN*) and negative (*priR*) regulatory genes. *J*  
867 *Bacteriol.* 1993;175: 1257–1263.
- 868 65. Hood RD, Singh P, Hsu F, Güvener T, Carl MA, Trinidad RRS, et al. A type VI  
869 secretion system of *Pseudomonas aeruginosa* targets a toxin to bacteria. *Cell Host*  
870 *Microbe.* 2010;7: 25–37. doi:10.1016/j.chom.2009.12.007
- 871 66. Lesic B, Starkey M, He J, Hazan R, Rahme LG. Quorum sensing differentially regulates  
872 *Pseudomonas aeruginosa* type VI secretion locus I and homologous loci II and III,  
873 which are required for pathogenesis. *Microbiol Read Engl.* 2009;155: 2845–2855.  
874 doi:10.1099/mic.0.029082-0
- 875 67. Turner KH, Vallet-Gely I, Dove SL. Epigenetic control of virulence gene expression in  
876 *Pseudomonas aeruginosa* by a LysR-type transcription regulator. *PLOS Genet.* 2009;5:  
877 e1000779. doi:10.1371/journal.pgen.1000779
- 878 68. Wade DS, Calfee MW, Rocha ER, Ling EA, Engstrom E, Coleman JP, et al. Regulation  
879 of *Pseudomonas* quinolone signal synthesis in *Pseudomonas aeruginosa*. *J Bacteriol.*  
880 2005;187: 4372–4380. doi:10.1128/JB.187.13.4372-4380.2005

- 881 69. Sams T, Baker Y, Hodgkinson J, Gross J, Spring D, Welch M. The *Pseudomonas*  
882 quinolone signal (PQS). *Isr J Chem.* 2016;56: 282–294. doi:10.1002/ijch.201400128
- 883 70. Déziel E, Gopalan S, Tampakaki AP, Lépine F, Padfield KE, Saucier M, et al. The  
884 contribution of MvfR to *Pseudomonas aeruginosa* pathogenesis and quorum sensing  
885 circuitry regulation: multiple quorum sensing-regulated genes are modulated without  
886 affecting *lasRI*, *rhlRI* or the production of N-acyl- l-homoserine lactones. *Mol*  
887 *Microbiol.* 2005;55: 998–1014. doi:10.1111/j.1365-2958.2004.04448.x
- 888 71. Xiao G, He J, Rahme LG. Mutation analysis of the *Pseudomonas aeruginosa mvfR* and  
889 *pqsABCDE* gene promoters demonstrates complex quorum-sensing circuitry. *Microbiol*  
890 *Read Engl.* 2006;152: 1679–1686. doi:10.1099/mic.0.28605-0
- 891 72. Zheng P, Sun J, Geffers R, Zeng A-P. Functional characterization of the gene *PA2384* in  
892 large-scale gene regulation in response to iron starvation in *Pseudomonas aeruginosa*. *J*  
893 *Biotechnol.* 2007;132: 342–352. doi:10.1016/j.jbiotec.2007.08.013
- 894 73. Mao X, Ma Q, Zhou C, Chen X, Zhang H, Yang J, et al. DOOR 2.0: presenting operons  
895 and their functions through dynamic and integrated views. *Nucleic Acids Res.* 2014;42:  
896 D654-659. doi:10.1093/nar/gkt1048
- 897 74. V. Solovyev, A Salamov. Automatic annotation of microbial genomes and metagenomic  
898 sequences. In: Li RW, editor. *Metagenomics and its applications in agriculture,*  
899 *biomedicine and environmental studies.* Nova Science Publishers; 2011. pp. 61-78.
- 900 75. Wang X, Le TBK, Lajoie BR, Dekker J, Laub MT, Rudner DZ. Condensin promotes the  
901 juxtaposition of DNA flanking its loading site in *Bacillus subtilis*. *Genes Dev.* 2015;29:  
902 1661–1675. doi:10.1101/gad.265876.115

- 903 76. Hittle LE, Powell DA, Jones JW, Tofigh M, Goodlett DR, Moskowitz SM, et al. Site-  
904 specific activity of the acyltransferases HtrB1 and HtrB2 in *Pseudomonas aeruginosa*  
905 lipid A biosynthesis. *Pathog Dis.* 2015;73. doi:10.1093/femspd/ftv053
- 906 77. Wang B, Li B, Liang Y, Li J, Gao L, Chen L, et al. Pleiotropic effects of temperature-  
907 regulated 2-OH-lauroyltransferase (PA0011) on *Pseudomonas aeruginosa* antibiotic  
908 resistance, virulence and type III secretion system. *Microb Pathog.* 2016;91: 5–17.  
909 doi:10.1016/j.micpath.2015.11.003
- 910 78. Shen L, Ma Y, Liang H. Characterization of a novel gene related to antibiotic  
911 susceptibility in *Pseudomonas aeruginosa*. *J Antibiot (Tokyo).* 2012;65: 59–65.  
912 doi:10.1038/ja.2011.111
- 913 79. Liang Y, Guo Z, Gao L, Guo Q, Wang L, Han Y, et al. The role of the temperature-  
914 regulated acyltransferase (PA3242) on growth, antibiotic resistance and virulence in  
915 *Pseudomonas aeruginosa*. *Microb Pathog.* 2016;101: 126–135.  
916 doi:10.1016/j.micpath.2016.09.019
- 917 80. Evensen G, Seeberg E. Adaptation to alkylation resistance involves the induction of a  
918 DNA glycosylase. *Nature.* 1982;296: 773–775.
- 919 81. Hengge R. Principles of c-di-GMP signalling in bacteria. *Nat Rev Microbiol.* 2009;7:  
920 263–273. doi:10.1038/nrmicro2109
- 921 82. Valentini M, Filloux A. Biofilms and Cyclic di-GMP (c-di-GMP) Signaling: lessons  
922 from *Pseudomonas aeruginosa* and other bacteria. *J Biol Chem.* 2016;291: 12547–  
923 12555. doi:10.1074/jbc.R115.711507

- 924 83. Stover CK, Pham XQ, Erwin AL, Mizoguchi SD, Warren P, Hickey MJ, et al.  
925 Complete genome sequence of *Pseudomonas aeruginosa* PAO1, an opportunistic  
926 pathogen. *Nature*. 2000;406: 959–964. doi:10.1038/35023079
- 927 84. Potvin E, Sanschagrin F, Levesque RC. Sigma factors in *Pseudomonas aeruginosa*.  
928 *FEMS Microbiol Rev*. 2008;32: 38–55. doi:10.1111/j.1574-6976.2007.00092.x
- 929 85. Veening J-W, Smits WK, Kuipers OP. Bistability, epigenetics, and bet-hedging in  
930 bacteria. *Annu Rev Microbiol*. 2008;62: 193–210.  
931 doi:10.1146/annurev.micro.62.081307.163002
- 932 86. Penterman J, Singh PK, Walker GC. Biological cost of pyocin production during the  
933 SOS response in *Pseudomonas aeruginosa*. *J Bacteriol*. 2014;196: 3351–3359.  
934 doi:10.1128/JB.01889-14
- 935 87. Kreuzer KN. DNA damage responses in prokaryotes: regulating gene expression,  
936 modulating growth patterns, and manipulating replication forks. *Cold Spring Harb*  
937 *Perspect Biol*. 2013;5: a012674. doi:10.1101/cshperspect.a012674
- 938 88. Baharoglu Z, Mazel D. SOS, the formidable strategy of bacteria against aggressions.  
939 *FEMS Microbiol Rev*. 2014;38: 1126–1145. doi:10.1111/1574-6976.12077
- 940 89. Modell JW, Hopkins AC, Laub MT. A DNA damage checkpoint in *Caulobacter*  
941 *croscientus* inhibits cell division through a direct interaction with FtsW. *Genes Dev*.  
942 2011;25: 1328–1343. doi:10.1101/gad.2038911
- 943 90. Erental A, Kalderon Z, Saada A, Smith Y, Engelberg-Kulka H. Apoptosis-like death, an  
944 extreme SOS response in *Escherichia coli*. *mBio*. 2014;5: e01426-14.  
945 doi:10.1128/mBio.01426-14

946 91. Nariya H, Inouye M. MazF, an mRNA interferase, mediates programmed cell death  
947 during multicellular *Myxococcus* development. Cell. 2008;132: 55–66.  
948 doi:10.1016/j.cell.2007.11.044

949

## 950 **Supporting information captions**

951 **S1 Figure.** Analysis of genes identified as altered in ParB<sup>+</sup> vs EV but not ParB<sup>+++</sup> vs EV.  
952 Abbreviation ParB<sup>+</sup> corresponds to PAO1161 (pKGB9 *araBADp-parB*) strain grown without  
953 arabinose, EV corresponds to PAO1161 (pKGB8 *araBADp*) grown with arabinose and  
954 ParB<sup>+++</sup> for PAO1161 (pKGB9 *araBADp-parB*) cells grown with arabinose. (A) Fold  
955 change- and *p*- values for the 35 genes in ParB<sup>+</sup> vs EV and ParB<sup>+++</sup> vs EV analysis. First  
956 subgroup of genes with  $-1.6 > FC > -2$  or  $1.6 < FC < 2$  and *p*-value  $< 0.05$  in ParB<sup>+++</sup> vs EV  
957 comparison is indicated in green. The second subgroup of genes with  $0.05 < p\text{-value} < 0.1$  in  
958 ParB<sup>+++</sup> vs EV comparison is indicated in blue. The third subgroup of genes with *p*-value  
959  $> 0.1$  and  $-1.5 < FC < 1.5$  is left uncoloured. Genes in operons are marked with arrows. (B)  
960 Impact of arabinose on the expression of selected genes. PAO1161 (pKGB8 *araBADp*) cells  
961 were grown in L broth containing chloramphenicol with or without 0.02% arabinose. RT-  
962 qPCR was performed cDNA synthesized on RNA isolated from cells harvested at OD<sub>600</sub> 0.5.  
963 Data represent mean  $\pm$ SD from three biological replicates. Expression values for all genes are  
964 shown relative to the cells from cultures without arabinose. \* - *p*-value  $< 0.05$  in two-sided  
965 Student's *t*-test assuming equal variance.

966 **S1 Table.** Oligonucleotides used in this work.

967 **S2 Table.** Transcriptomic changes between analyzed PAO1161 strains. (A) Comparison of  
968 PAO1161 (pKGB8 *araBADp*) (EV) vs PAO1161 (WT). (B) Comparison of PAO1161  
969 (pKGB9 *araBADp-parB*) grown without arabinose (ParB<sup>+</sup>) vs EV. (C) Comparison of

970 PAO1161(pKGB9 *araBADp-parB*) grown with 0.02% arabinose (ParB<sup>+++</sup>) vs EV. **(D)** List  
971 of 211 loci displaying altered expression in ParB overproducing cells.

972 **S3 Table.** K-means clustering of ParB dependent loci. Mean levels of transcripts for all loci  
973 are shown relative to PAO1161 (pKGB8 *araBADp*).

974 **S4 Table.** Genes with altered expression in response to ParB deficiency (PAO1161 *parB<sub>null</sub>*)  
975 and ParB overproduction [PAO1161 (pKGB9 *araBADp-parB*) grown with or without 0.02%  
976 arabinose vs PAO1161 (pKGB8 *araBADp*)].

**A**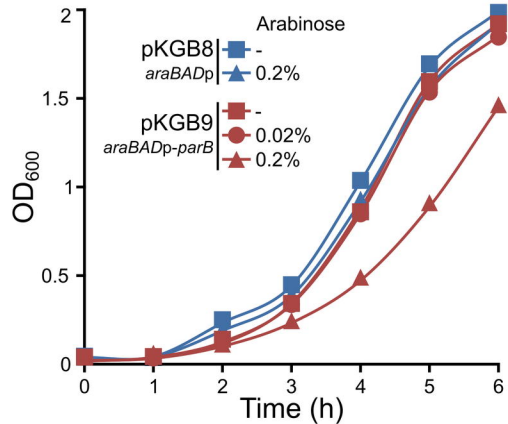**B**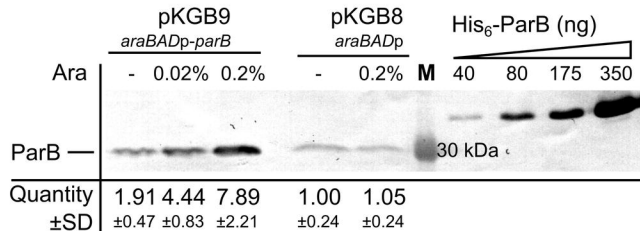**C**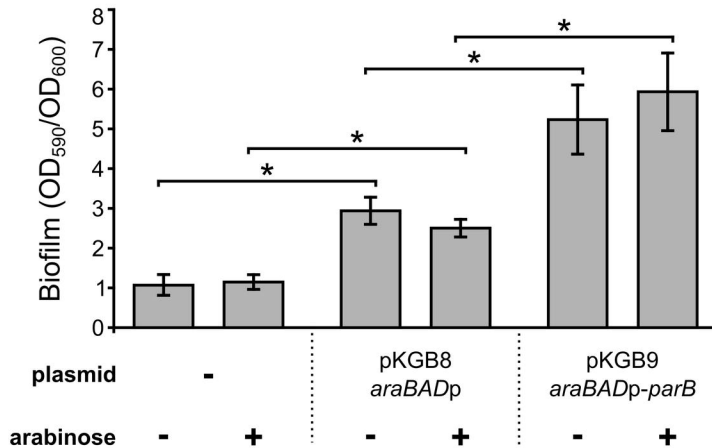



**A**

|               | Total | UP  | DOWN |
|---------------|-------|-----|------|
| EV vs WT      | 78    | 33  | 45   |
| ParB+ vs EV   | 157   | 114 | 43   |
| ParB+++ vs EV | 176   | 129 | 47   |

**B**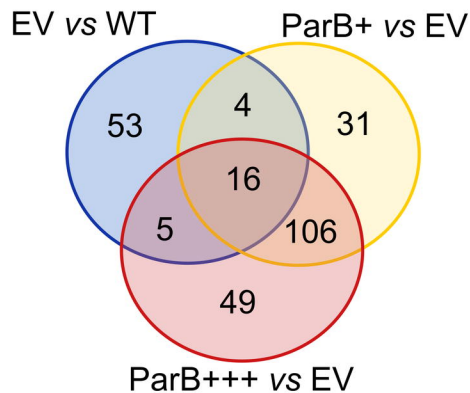**C**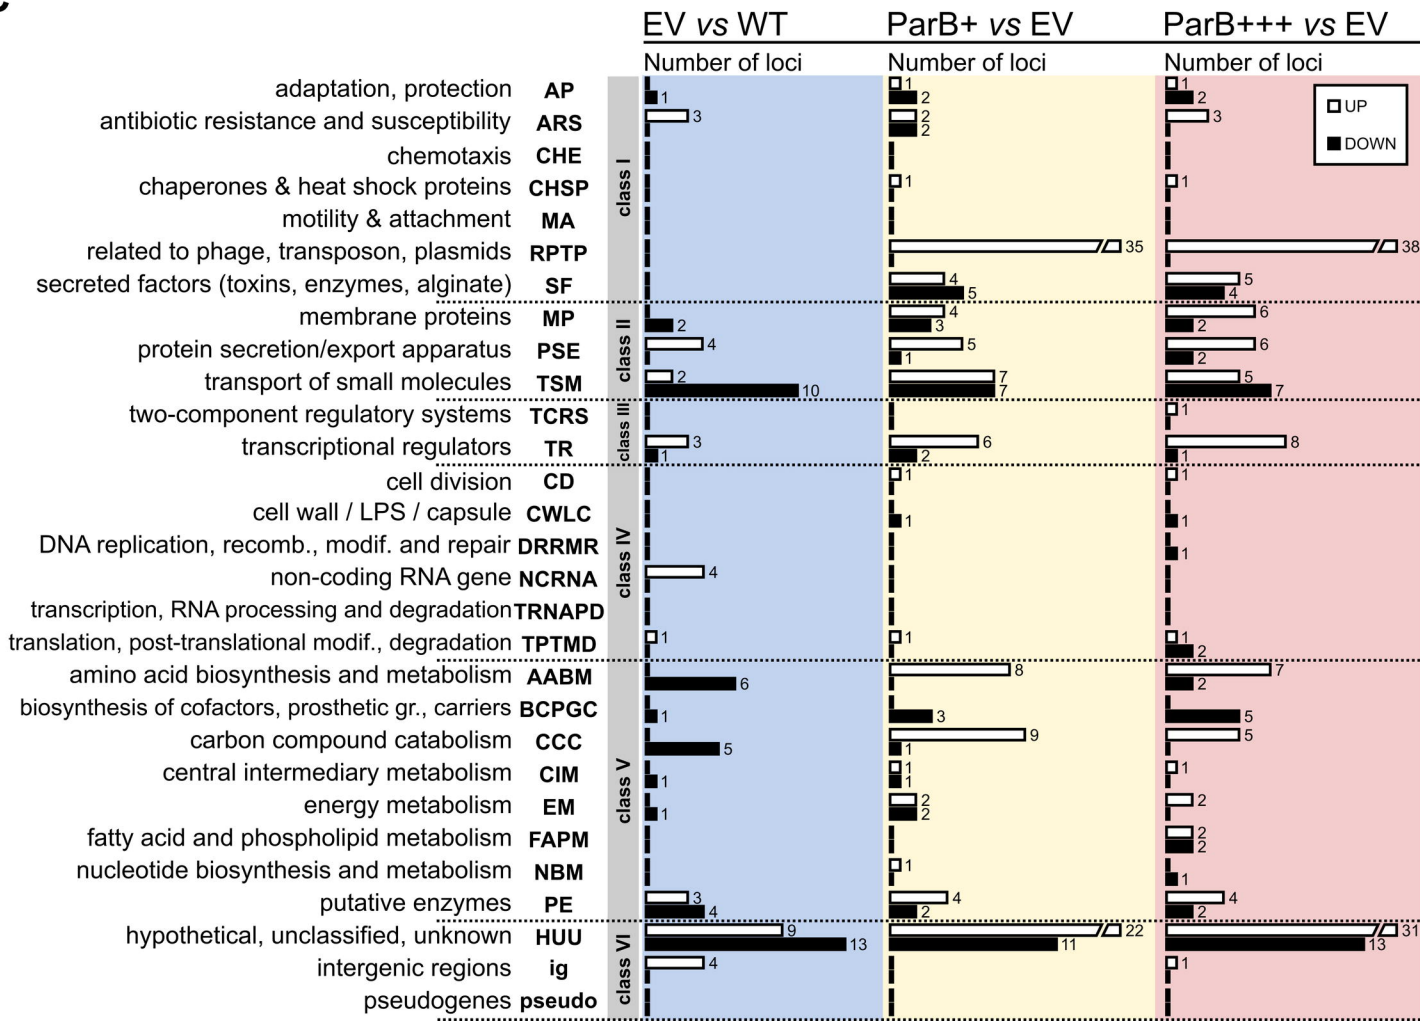

**A**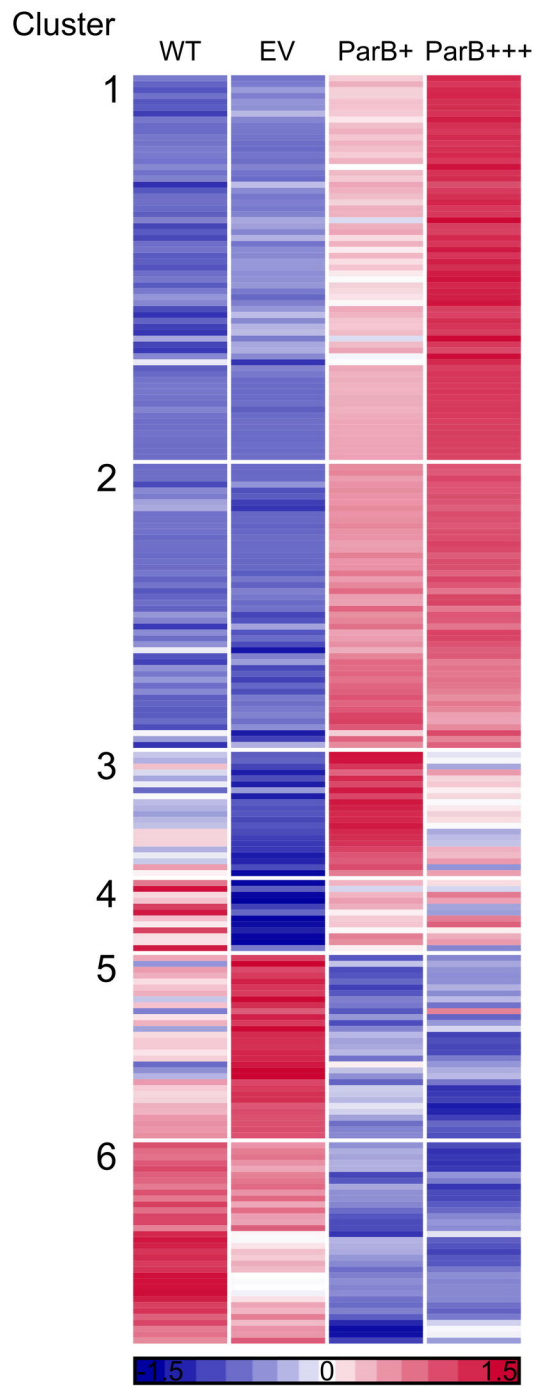**B**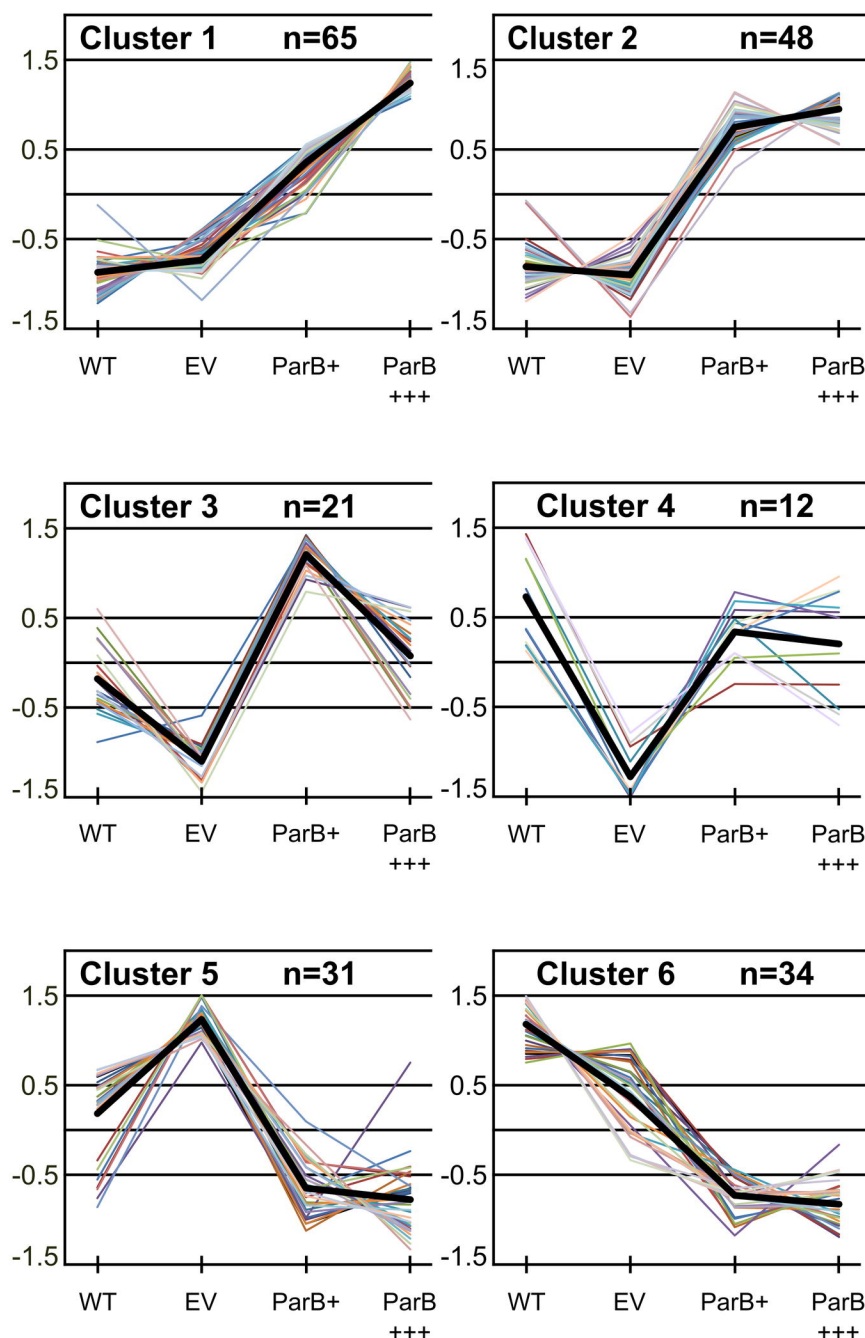

# PAO1161::*bexRp-lacZ*

pKGB8 *araBADp*

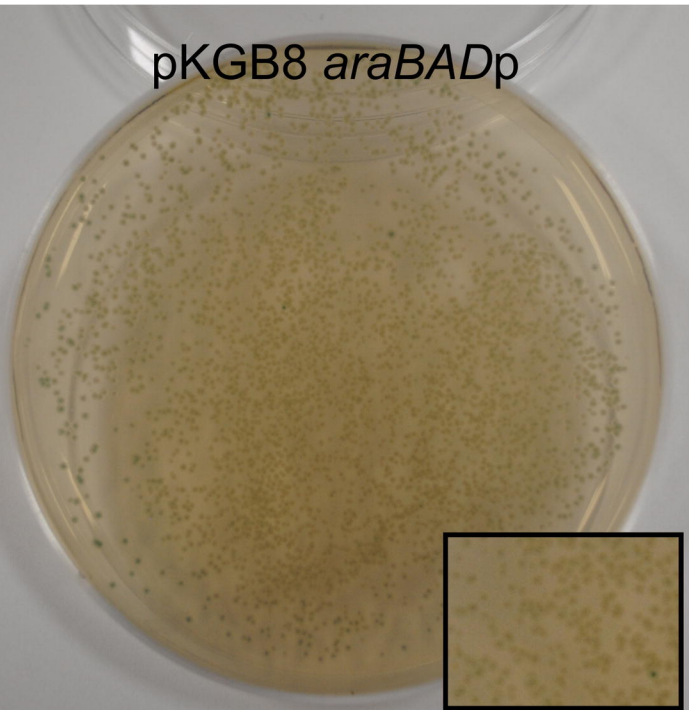

pKGB9 *araBADp-parB*

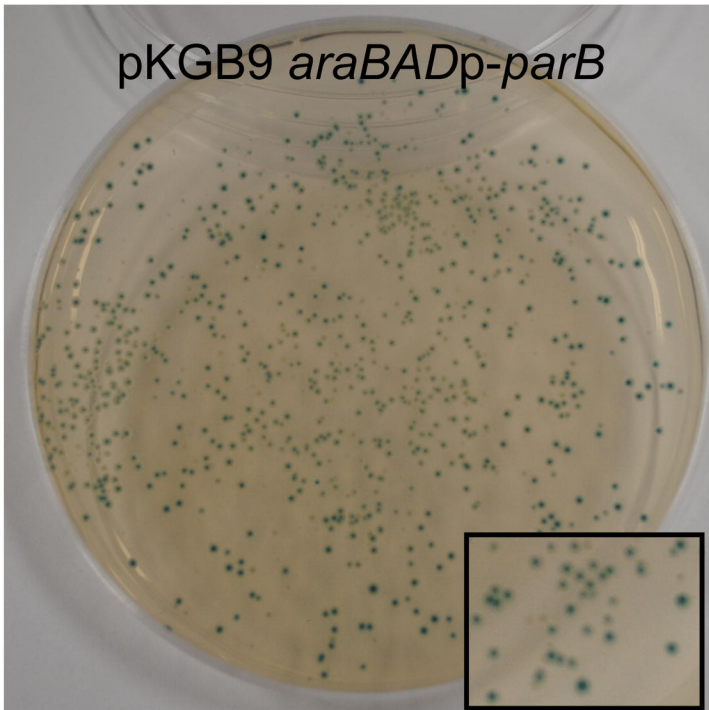

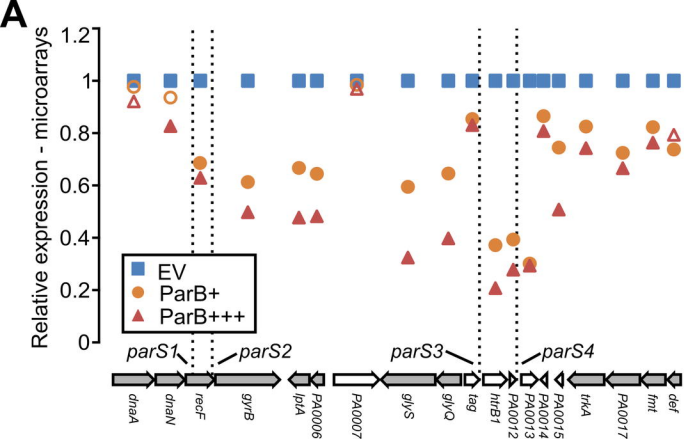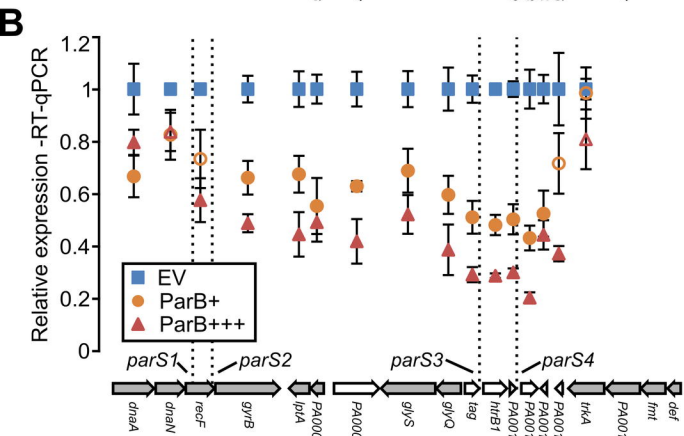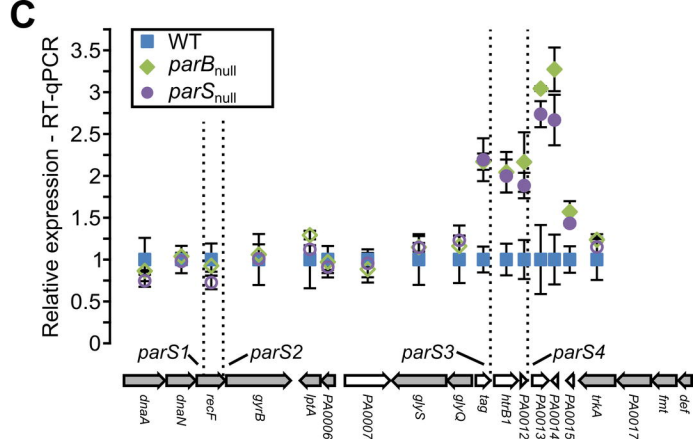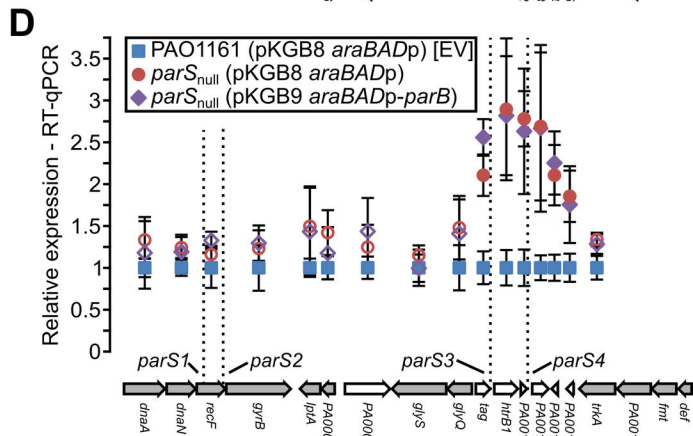

**A**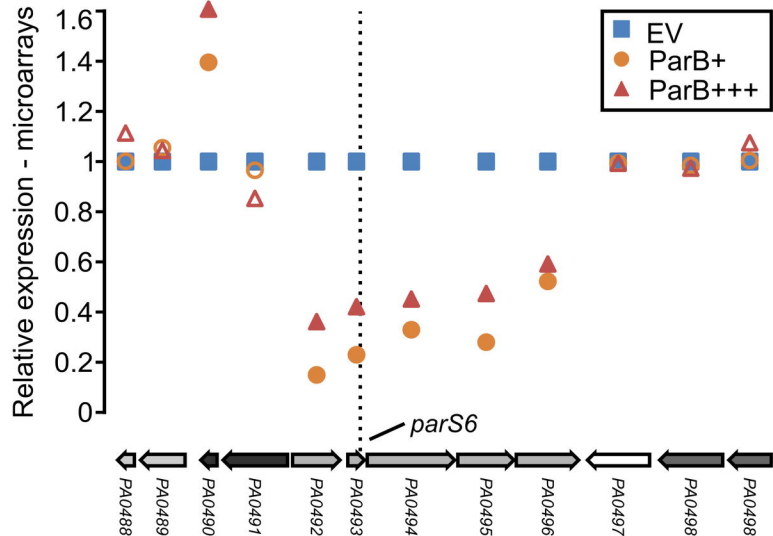**B**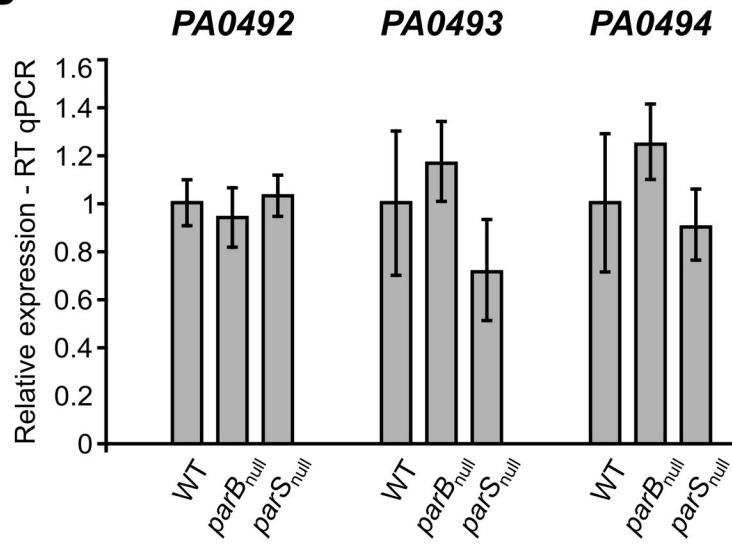

**A****PA011p**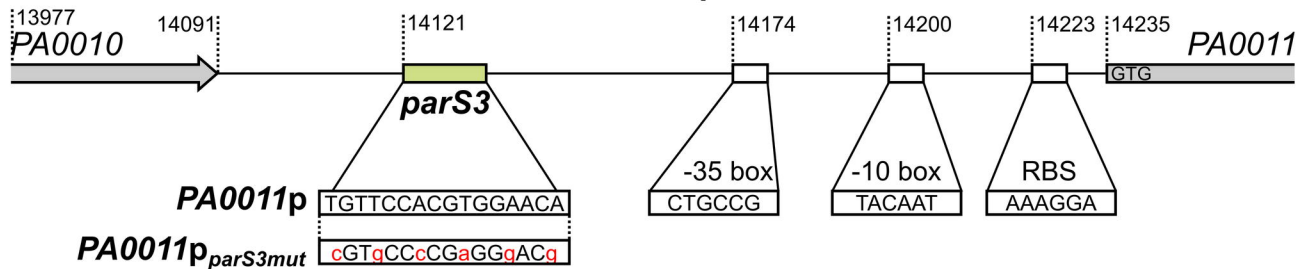**PA013p**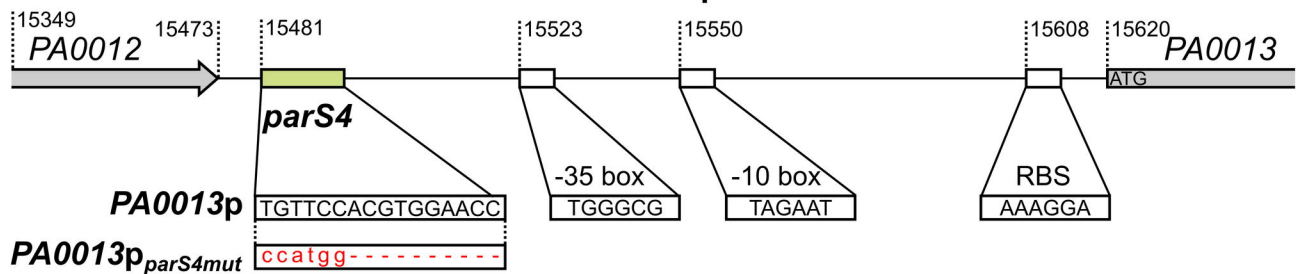**B****PA01161::araBADp (control)**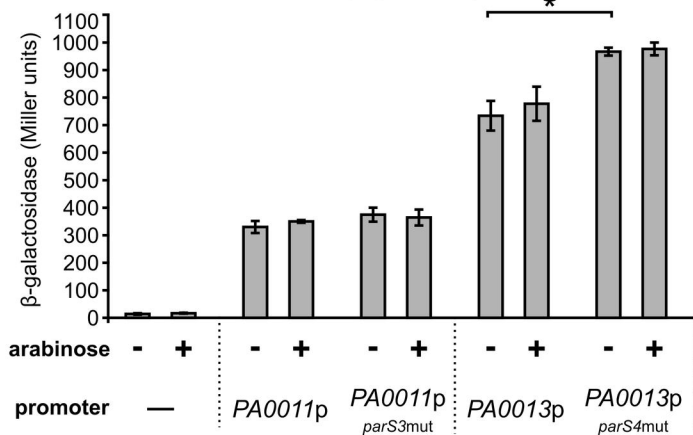**C****PA01161::araBADp-flag-parB**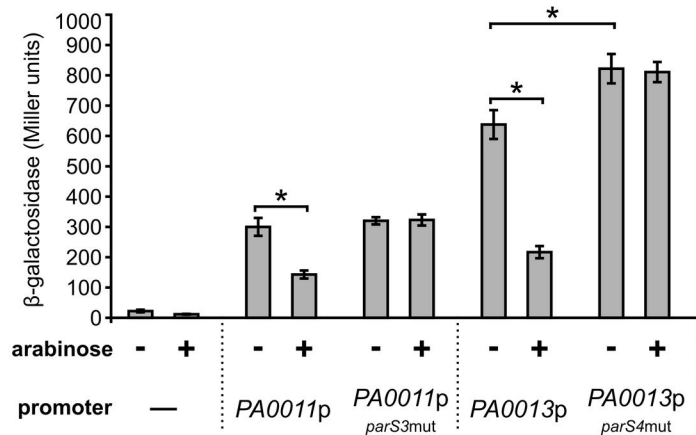

Source: https://www.biorxiv.org/content/10.1101/151340v1.full.pdf
